# Supplementary material for: Human population dynamics and Yersinia pestis in ancient northeast Asia
Source: PubMed Central journal article supplement — Sci Adv. 2021 Jan 6;7(2):eabc4587. doi: 10.1126/sciadv.abc4587 (PMC7787494; doi:10.1126/sciadv.abc4587), 2021-01-06
Supplement: abc4587_SM.pdf [file abc4587_SM.pdf]

## Supplementary Materials for

### **Human population dynamics and *Yersinia pestis* in ancient northeast Asia**

Gülşah Merve Kılınç\*, Natalija Kashuba, Dilek Koptekin, Nora Bergfeldt, Handan Melike Dönertaş, Ricardo Rodríguez-Varela, Dmitrij Shergin, Grigorij Ivanov, Dmitrii Kichigin, Kjunnej Pestereva, Denis Volkov, Pavel Mandryka, Artur Kharinskii, Alexey Tishkin, Evgenij Ineshin, Evgeniy Kovychev, Aleksandr Stepanov, Love Dalén, Torsten Günther, Emrah Kırdök, Mattias Jakobsson, Mehmet Somel, Maja Krzewińska, Jan Storå\*, Anders Götherström\*

\*Corresponding author. Email: [anders.gotherstrom@arklab.su.se](mailto:anders.gotherstrom@arklab.su.se) (A.G.); [jan.stora@ofl.su.se](mailto:jan.stora@ofl.su.se) (J.S.); [gulsahkilinc@hacettepe.edu.tr](mailto:gulsahkilinc@hacettepe.edu.tr) (G.M.K.)

Published 6 January 2021, *Sci. Adv.* 7, eabc4587 (2021)  
DOI: 10.1126/sciadv.abc4587

#### **The PDF file includes:**

Supplementary Text  
Figs. S1 to S32  
Tables S1 to S24  
Legends for data files S1 to S5  
References

#### **Other Supplementary Material for this manuscript includes the following:**

(available at [advances.sciencemag.org/cgi/content/full/7/2/eabc4587/DC1](https://advances.sciencemag.org/cgi/content/full/7/2/eabc4587/DC1))

Data files S1 to S5

## **Supplementary Text**

### Archaeological background

#### General archaeological information about the northeast Asia

The archaeological finds from the Pleistocene, corresponding to the Middle to the Upper Palaeolithic periods, in the northeast Asia are rather scarce. This has been explained by the volatile climatic conditions and overall fluctuations and changes of the environment affecting the conditions for the human groups: the Ice Age cold period, the late Pleistocene temperature fluctuations and the post-tectonic activity of the Baikal rift zone. During the period corresponding to the Palaeolithic period, Baikal became a deep lake while the eastern terraces of the Baikal basins were uplifted and the formation of the Baikal outlet into the Angara River 60,000 years ago occurred (70). There is a correlation between these events and the scarcity of the archaeological sites in the Pleistocene. The Khaiyrgas cave is one of the few notable sites providing the opportunity to view the collections of artefacts from several periods, starting from the Upper Palaeolithic.

A different scenario was seen in the Holocene populations of northeast Asia, represented by a diversity of cultural complexes, with a continuous presence of human occupation in some of the ecologically favourable areas up until today. The general chronological outline for the human groups close to Baikal during the first half of the Holocene is characterized by two main complexes in the Early Mesolithic-Middle Neolithic and in the Late Neolithic-Bronze Age associated with the Kitoi and the Glazkovo cultural complexes, respectively. On the territory of the Baikal region (Angara, Upper Lena, Baikal, Vitim), the late Mesolithic burial complexes were identified - related to the Khinsky and Schukin burial traditions; Early Neolithic - the Chinese tradition of burials; Late Neolithic — Isakovskaya, Serovskaya, Late-Serovskaya for Priolkhonya, “burial traditions” for the Upper Lena “archaic”.

A Mesolithic human occupation has been discovered in both the Cis-Baikal and the Trans-Baikal areas. Some aspects of the Mesolithic cultures in northeast Asia are considered as pan-Eurasian, such as the use of red ochre. Red ochre is found in burial complexes of the Early and Late Neolithic of Pribaikalye. Regional differences are seen in the broad variety of local lithic traditions, use of different materials (for example nephrite) as well as composite tools, fishery-associated artefacts

and, finally, the early use of pottery. The complexity of the Mesolithic/Early Neolithic cultures of the northeast Asia is seen in the variation of the material used by people to make lithic tools and exceptional in the case is the Dzhyllinda burial included in the present study (sample: irk00x, Dzhyllinda-1). The variation of the cultures in the early Holocene may be explained by the specialization of regional groups as means of adaptation to different ecological environments, which vary from alpine and forested areas to lowland steppe and tundra in northeast Asia (71). The Late Neolithic-Bronze Age complex of cultures (Serovo, Isakovo and Galzkovo) show more homogenous expressions and characteristics than the Mesolithic and Early Neolithic cultural-complexes, but with a large variation in pottery styles.

There is a period between the two main cultural complexes mentioned above, during which archaeological finds in the Cis-Baikal area are few. This “hiatus” has been in focus of discussions and different views and interpretations have been presented, suggesting that it may have lasted anywhere between 100 and a 1,000 years. Other “hiatus” periods have most often been associated to unfavourable ecological conditions (72).

The development of the human populations and the movements of groups are complicated to follow and interpret due to the complexity of the archaeological record. Often the burial sites have several cultural layers associated to different cultural manifestations and the specific chronological circumstances are not always fully understood. Exemplary in this case is the Cyclodrom/Lokomotiv, the large necropolis in Irkutsk, which contained burials from the Mesolithic and up to the Bronze Age. Regarding the movements of people during the first part of the Holocene, there has been a general consensus of directions of mobility and migrations, which are linked to the appearance and dispersal of Late Neolithic and Bronze Age culture complexes through the areas near Baikal and the Lena river valley. The most often identified directions of mobility in these periods have been from west to east and from south to north.

#### Archaeological contexts of the studied individuals

In this study, we studied 40 samples from 5 distinct administrative regions in Russian Federation including: Trans-Baikal, Cis-Baikal, Yakutia, Krasnoyarsk Krai and Amur Oblast. Chronologically, the samples cover a time period between the Late Upper Paleolithic and the

Medieval era. The majority of individuals in our study are dated to the Neolithic and Bronze Ages. A Late Upper Paleolithic individual (yak025, Khaiyrgas-1) included in this study was recovered in the Khaiyrgas Cave in Yakutia (18). Archaeological information for 38 of the 40 samples (Table S1) sequenced here was provided in (18). In this study, we report 2 additional individuals including cta016 which is from the Trans-Baikal region and dated to 8,345 to 8,185 BP and Matta-1 (N2a) which is from the Yakutia region and dated to 6,845 to 6,665 BP. We provide archaeological information for these two samples below.

Archaeological periods do not have heuristic meaning, since there are no specific criteria for distinguishing these periods as in European context while analyzing materials from Asia. For example, pottery appears in the Late Paleolithic and Mesolithic; Paleolithic traditions of lithic technologies exist in the Neolithic. Still, archaeological periods for the analyzed individuals have been determined according to a general chronological frame of the north Asian archaeological cultural complexes (73–80) (Table S1). In brief, genome sequence data from Yakutia include a Late Upper Palaeolithic (c.16,900-16,450 BP) individual (0.3X genome coverage); two Early/Middle Neolithic (c.6,850-6,190 BP) individuals (0.03X to 0.05X); six Late Neolithic (c.4,780-3,080 BP) individuals (0.2X to 8.9X); and an Early Iron Age (c.2,750-2,490 BP) individual (0.07X); from Trans-Baikal encompasses two Mesolithic (c.8,515-8,185 BP) individuals (1.1X to 4.7X), five Neolithic (c.7,460-5,940 BP) individuals (0.1X to 3.8X); and a Bronze Age (c.3,210-3,000 BP) individual (0.1X); from Cis-Baikal consists of two Mesolithic (c.8,980-7,855 BP) individuals (2.17X to 3.49X); nine Neolithic (c.6,100-4,600 BP) individuals (0.4X to 14.5X); eight Bronze Age (c.4,530-3,700 BP) individuals (0.1X to 8.7X); and a Medieval (c.675-560 BP) individual (0.5X); from Krasnoyarsk Krai encompasses a Bronze Age (c.4,280-4,085 BP) individual (13.6X); and from Amur Oblast covers an Iron Age (c.1,345-1,270 BP) individual (0.7X) (fig. S1, table S1). Below we present a short description of the archaeological contexts of the studied individuals:

#### Cis-Baikal group

Of the studied 40 individuals, 20 were from the Cis-Baikal area encompassing Angara River basin, Lena River basin and Lake Baikal region.

### Angara river group (10 individuals)

The sites of Cyclodrome (Lokomotiv) (irk051, Cyclodrome-1) and Glazkovo (irk036) both belong to the Glazkovo necropolis in Irkutsk (81, 82). The sites were excavated by several researchers during the 20th century (83–85). The Glazkovo necropolis in Irkutsk contains burials belonging to both the Kitoi and the Glazkovo cultural-complexes (81). The individual from Glazkovo necropolis (irk036) belongs to the Glazkovo culture, which dates to Early Bronze Age. The Suhaja Pad' Buret' site, burial 2 (irk025) is from the Early Bronze Age (81–84). The Ust'-Dolgoe (Ust'-Dolgaya) site, burial 3 (irk022) is also a Glazkovo site, based on the burial inventory (81). Chastaja (Chastye) Padi (irk033) is both a burial and a settlement site. The burials belong to Glazkovo culture while the settlement site had a layer with fragments of pottery with net-imprint (81). Anosovo-1 (irk050) was excavated from an Eneolithic Glazkovo site (81). Podostrozhnoe is a term used for a group of sites, including Kirpichnyj Saraj (irk034), Gorodische site N 1 (irk040) and Podostrozhnoe site N 3 (irk057). Burial 3 from the Zarubino site (irk032) is a Medieval burial.

### Lena river group (7 individuals)

The sites at Zvjozdochka (irk061) were excavated by Okladnikov in 1930 at the left bank of Lena river. These sites were classified as Glazkovo culture sites. The sites at Korkino (irk030), Shishkino N1 (irk068) and Makarovo (irk017) are also classified as Glazkovo culture sites. The Silinskij burial site (irk008) lies on the left bank of Lena River. Popovskij Lug is a collective name used for a number of Neolithic-Bronze Age sites (86). In 2010 an archaeological expedition at Popovskij Lug II unearthed a single male burial (irk007, Popovskij-1). The burial is the oldest earliest documented burial in Cis-Baikal with ceramic as grave goods (87) and attributed to the early Neolithic of Baikal region based on the morphology of the burial equipment and the presence of ceramics. Makrushino (burial 26, mak026) is a burial site containing material from the Early Neolithic to the Bronze Age in the Kachug District (88).

### Baikal Lake (3 individuals)

The Mys Uyuga burial 2 (individual 1- irk071) is a double burial situated on the peninsula of Mys Uyuga (89, 90). The Shamanka 2 site (Individual 1, irk076) is a site situated on the southern side of the cape Shamanka (78). The Sokhter site, complex 1 contains a single burial (burial 5, irk075)

excavated in 1994 (91). This burial is a *Shumilikhinskaja* burial type, and dated to the Neolithic/Early Bronze Age (78).

#### Trans-Baikal group (8 individuals)

The analysed burials in the Trans-Baikal group are all located east of the Lake Baikal. The sites are: Izvestkovaja-1 (burial 1-brn008 and burial 2-brn001), Nozhyj lake burial site-2 (burial 6, skeleton 3, brn012 and one individual from a burial without a number, brn002), Okoshki-1 (irk078), Dvorcy-Dacha burial (brn003) and Dzhylynda (irk00X, Dzhylynda-1). Chronologically the samples are spread from c.8,514 and 5,940 cal BP (92). The Okoshki-1 Burial 23 (irk078) is dated to the Bronze Age (93, 94). We include one new individual from the area in this study (cta016). It is from one of the few known Stone Age burial grounds in Trans-Baikal region. The site is located 7 kilometers off the Duroy village, on the western side of the Bol'shaja Kanga - 1 mountain (*Большая Канга-1*) by the Argun river. From 65 burials two were considered to be Stone Age burials, based on for example appearance of red ochre by the remains of the individual. A tooth from mandible of the individual 1 was taken for analyses. The bone tools and remaining inventory from this part of Trans-Baikal suggests a hunter/fisher-gatherer lifestyle (95).

#### Yakutia (Sakha Republic) group (10 individuals)

The samples from Yakutia located geographically in three areas: Southwestern Yakutia (Khairyrgas Cave at the Lena river (yak025, Khairyrgas-1)), central Yakutia (samples=yak030 (N3a), N4a1, N4b2, N5a (Onnyos-1)) and northeastern Yakutia (yak021-024). The following sites are included in the present study; *Khairyrgas cave* (yak025, Khairyrgas-1), *Onnyos* (N5a, Onnyos-1), *Kyordyughen* (Kyordyughen 2, N4a1; Kyordyughen 1, burial 1, N4b2), *Kamenka 2* (individual 1, Kamenka-1, yak022; individual 2, Kamenka-2, yak023; and individual 3, yak024, Kamenka-3); Pomazkino (yak021), and Dyupsya (yak030), (8, 91). The Onnyos burial (N5a, Onnyos-1) belongs to the Belkachi culture complex (96). The Kyordyughen site is dated to the Late Neolithic (97, 98). Kyordyughen 1 is a double burial and we include both individuals (N4b2, Ind 1) and (N4a1, Ind 2) (99). The Kamenka-II burial contained three juvenile individuals (96, 100) (individual 1-yak022, individual 2-yak023 and individual 3-yak024) (101). From the Pomazkino-III site we include burial 2 (yak021) (97). The Dyupsya burial (yak030, labelled as N3a in (18) is dated to the Early Iron Age (102, 103). We include one previously unpublished individual from the area (N2a,

Matta-1). It is from the Matta burial which was found on the terrace of the Matta Lake which is located in Megino-Kangalassky ulus (district), 26 km east of the Lena River. The skeleton belonged to a female and had bones from a metatarsal or metacarpal from a species of the genus *Lepus* instead of the left hand of the individual (104). The fragments taken for the analyses are bones from left foot: metatarsale 1, os cuneiforme 2 (105).

#### Krasnoyarsk Krai (1 individual)

The region of Krasnoyarsk Krai is represented by burial 1 (kra001) from the Nefteprovod-2 site.

#### Amur Oblast (1 individual)

The Blagoveschensky District of Amur Oblast is represented by burial 2 (bla001) from the Oktyabr'skoe site.

#### Radiocarbon dating and stable isotope analysis

All samples except yak024 (Kamenka-3) were radiocarbon dated using AMS radiocarbon dating (table S1) (18). Kamenka-3 could not be dated due to poor quality of the sample but it was found in the same burial with yak022 (Kamenka-1) and yak023 (Kamenka-2). Calibration of the conventional radiocarbon ages was performed using Oxcal version 4.3.2 (106), and the IntCal13 atmospheric curve (107). Calibrated results (BCE) were reported with 95% confidence intervals (2 $\sigma$ ) (figure S1, table S1). The isotopic values for a few samples exhibit elevated  $\delta^{15}\text{N}$ -values ( $>+16$ ) (table S1) (70). A few of these values were measured on deciduous teeth and probably exhibit an effect of weaning. Although some level of freshwater reservoir effect (FRE) might affect the age estimations this does not have major consequences for the present study (70).

#### Evaluation of biological relatedness

In Trans-Baikal group, we found that brn002 was a second or third degree relative of brn012. In Cis-Baikal group, irk022 was a 3rd-5th degree relative of irk025. Within the Yakutia group, yak021, yak022 (Kamenka-1), yak023 (Kamenka-2) and yak024 (Kamenka-3) were biologically related at different degrees from first to third-fifth degree (Table S1). We excluded from the frequency-based analyses one individual from each pair of related individuals with a  $k_0$  values  $< 0.9$ . The excluded individuals are brn002, irk022, yak024 (Kamenka-3), yak023 (Kamenka-2),

yak021 (Table S1). Note that the high genetic diversity within the ancient samples due to their wide spatial and chronological differences may produce an underestimation of the relatedness degree between some of the studied individuals.

### Uniparental markers

#### Y haplogroups

All individuals were accredited either to Y macro-haplogroup Q or N. The one possible exception was individual irk032 (probable carrier of Hg I\*), which was dated to the Medieval period. In short, all of the oldest (Mesolithic and Neolithic) and most eastern (Trans-Baikal and Yakutia) individuals were carriers of N1c1a1 lineage, while Bronze Age males from Cis-Baikal region were all carriers of Q1a2a and its variants. The individual from Cis-Baikal region (irk007, Popovskij-1) may have been a carrier of N1c2b2 lineage associated with present-day Khanty and Komi populations of western Siberia (14). This pattern is in line with earlier findings suggesting both lineages were widespread among individuals from Neolithic Lokomotiv and Shamanka cultures around Lake Baikal (16) (Table S18).

#### Mitochondrial haplogroups

All individuals carried non-African mitochondrial macrohaplogroups of M, N and R (18) (Table S1). Individuals from Trans-Baikal group carried east Eurasian haplogroups of A, D, C, G and their sub-haplogroups. Cis-Baikal group carried A, C, D, F and their sub-haplogroups and also one Cis-Baikal individual carried R1b mitochondrial haplogroup. Similarly this R1b haplogroup was also found in Khaiyrgas-1 (yak025), the Late Upper Palaeolithic subadult female from Yakutia. Other Yakutia individuals carried the A, C, D and F haplogroups (Table S1) (18).

#### Model-based clustering for modern populations

We run the ADMIXTURE on modern samples and projected the ancient samples on this. At this point, to decide which K explains the observed pattern better, we examined each K and present the results for all Ks (fig. S3, table S4).

In brief, at K=2, modern populations separated into African (dark-red) and non-African (navy) components; ancient Siberians carried non-African component. At K=3, the new component



separated present-day east Asia & Native America populations (dark-green) and west Eurasia populations (navy); ancient Siberians carried mostly the east Asia component (dark-green) and to a lesser degree the west Eurasia component (navy). At K=4, the new component separated present-day east Asia (dark-green) and Native America (purple) populations; ancient Siberians carried slightly more east Asia (dark-green), and to a lesser degree Native America (purple) and west Eurasia (navy) components. At K=7, the new component separated present-day southeast Asia (brown) and east Asia (dark-green) populations; ancient Siberians carried this component at low levels compared to east Asia (dark-green) component. At K=8, the new component (yellow) maximized in present-day Far East populations including Itelmen and Koryak (see fig. S4 for geographical locations of populations); ancient Siberians carried almost equal amount of Far East (yellow), east Asia (dark-green), and west Eurasia (navy) components and less amount of Native America (purple) and southeast Asia (brown) components. At K=9, the new component (light-blue) split up the west Eurasia populations into north (navy) and south (light-blue) components and also separated the west European Mesolithic hunter-gatherers and Neolithic farmers; this component present in very low levels in ancient Siberians. At K=13, Siberian ancestry split up into Far East (pink-orange) and north Siberian (yellow) components; this new Far East (pink-orange) component was present in ancient Siberian genomes in low amount compared to north Siberian (yellow) component. Starting from K=14 to K=16 the observed pattern continued, Therefore, we present the results for K=14 in (Fig. 2 and fig. S4).

#### Analysis for *Yersinia pestis* (*Y. pestis*)

*Y. pestis* is recently diverged from a less virulent species *Y. pseudotuberculosis* (108). Therefore, one of the main methodological problems to identify *Y. pestis* sequences in archaeological samples is the sequence similarity of these two closely related species. To this end, a hybrid genome combining *Y. pestis* and *Y. pseudotuberculosis* reference genomes was created in (39). In this study, aDNA reads were aligned to this hybrid genome and the reads that were mapped to *Y. pestis* CO92 reference genome were extracted. To judge the taxonomical origin of *Y. pestis* sequences, edit distance distribution, length distribution, deamination patterns, and breadth of coverage information were used. Edit distance is the number of substitutions between the DNA sequence and its respective reference genome portion. It implies the similarity between the reference genome and the aligned read and it could be used as a marker to judge the quality of the alignment. Most

of the reads should be perfectly aligned to the reference genome (that means 0 edit distance). Deamination patterns at the 5' and 3' ends of the DNA sequences prove the authenticity of the sequences. Right skewed length distribution (with a mean around 50bp) shows that the DNA sequences are fragmented thus supporting the authenticity. The genome coverage and a homogenous genome-wide distribution of the alignments is an important factor to prove authenticity and presence of the microbe (109). Generally, reads could stack in multi-locus repetitive regions that share the sequence homology between bacterial species. Those areas results with a peak in the coverage and causes misinterpretation. So, a careful examination of the read distribution is also important.

In this study we analyzed 205 sequence libraries from 40 different samples to detect the *Y. pestis* presence. In Anosovo-1 (irk050), Kamenka-1 (yak022) and Kamenka-2 (yak023) we detected notable amounts of aDNA reads associated with *Y. pestis*. Specifically, Our 9,523 aDNA reads in Anosovo-1, 2,480 aDNA reads in Kamenka-1, and 4,176 aDNA reads in Kamenka-2 were assigned to *Y. pestis* CO92 reference genome (Table S20). The Kamenka-2 from Yakutia in eastern Siberia is to our knowledge the most northeastern findings of *Y. pestis* to this day (fig. S23).

#### Identification of *Y. pestis* aDNA sequences in Anosovo-1

After the mapping to the hybrid genome and filtering processes, we found that 9,395 aDNA reads specifically mapped to *Y. pestis* genome in the Anosovo-1 sample. After removing the optical PCR duplicates, 3,289 of aDNA reads were used for the further analysis. We observed that 1650 aDNA reads aligned to CO92 reference genome with 0 edit distance followed by 991 aDNA reads with an edit distance 1, 363 aDNA reads with 2 edit distance, and 166 aDNA reads with an edit distance 3 (fig. S24A). Also the fragment length distribution was skewed with a mean of 54.1657 nucleotide (fig. S24B). Nucleotide misincorporation patterns showed the authentic deamination patterns at the end of the DNA sequences (fig. S24C). The overall coverage was 1.85% for the whole genome. *Y. pestis* CO92 genome has one chromosome and three plasmids so it is possible to check the coverage for each of them. Table S21 shows the statistics for the individual sequences in *Y. pestis* genome. Results show that we covered %3.66 of the *Y. pestis* CO92 chromosome (table S21). Reads were also homogeneously distributed among the chromosomes except pPCP1 plasmid (fig.

S25). These plots should be interpreted with caution since it is not possible to make X axis wide enough to accommodate all alignments. Still, reads were distributed among the genome homogeneously. Also, we checked the alignments using IGV. We did not find any spurious mappings. We observed that more than 90% of the aDNA reads aligned to *Y. pestis* genome with less than 3 edit distance.

#### Identification of *Y. pestis* aDNA sequences in Kamenka-2 (yak023)

After mapping to the hybrid genome and filtering, we found that 4,176 aDNA reads were specifically mapped to *Y. pestis* genome in Kamenka-2. After removing 26% of the clonal sequences, 3,070 of aDNA reads were used for the further analysis. We observed that 1,784 aDNA reads aligned to CO92 reference genome with 0 edit distance followed by 848 aDNA reads with an edit distance 1, 251 aDNA reads with 2 edit distance, and 67 aDNA reads with an edit distance 3 (fig. S26A). Also the fragment length distribution was skewed with a mean 51.36 nucleotide length (fig. S26B). Nucleotide misincorporation patterns showed the authentic deamination patterns at the end of the DNA sequences (fig. S26C). The overall coverage was 1.65% for the whole genome. We checked the coverage for one chromosome and three plasmids of *Y. pestis*. Table S22 shows the statistics for the individual sequences in *Y. pestis* genome. Results show that we covered %3.16 of the *Y. pestis* CO92 chromosome (table S22). However we could not find aDNA reads mapped to plasmid pCP1. Then we analysed the genome coverage (fig. S27). We observed that more than 90% of the aDNA reads aligned to *Y. pestis* genome with less than 3 edit distance. Also we observed a homogenous distribution in coverage.

#### Identification of *Y. pestis* aDNA sequences in Kamenka-1 (yak022)

After mapping to the hybrid genome and filtering process, we found that 2,480 aDNA reads were specifically mapped to *Y. pestis* genome in Kamenka-1 sample. After removing 34% of the clonal sequences, 1,640 of aDNA reads were used for the further analysis. We observed that 1,403 aDNA reads aligned to CO92 reference genome with 0 edit distance followed by 148 aDNA reads with an edit distance of 1, 28 aDNA reads with edit distance of 2, and 6 aDNA reads with an edit distance of 3 (fig. S28A). Also the fragment length distribution was right-skewed with a mean 46.4207 nucleotide length (fig. S28B). Nucleotide misincorporation patterns did not show the authentic deamination patterns at the end of the DNA sequences (fig. S28C). The overall coverage

was 0.79% for the whole genome. We checked the coverage for one chromosome and three plasmids of *Y. pestis*. Table S23 shows the statistics for the individual sequences in *Y. pestis* genome. Results show that we covered %1.56 of the *Y. pestis* CO92 chromosome (table S23). In Kamenka-1 sample, we could not find aDNA reads mapped to plasmid pCP1. Then we analysed genome coverage (fig. S29). We observed that more than 90% of the aDNA reads aligned to *Y. pestis* genome with less than 3 edit distance. Therefore, we could not validate the presence of *Y. pestis* in this individual.

Overall, in our analysis, deamination rate in *Y. pestis* reads is relatively higher than the rate in human reads (table S24) for all these samples.

### Functional SNPs

#### Accelerator phenotype

N-acetyltransferase 2 gene (*NAT2*) is involved in the metabolism of a wide variety of foreign chemical substance (xenobiotics) (110). The metabolism can be either fast, intermediate or slow and the status has been linked to differential response to various drugs and carcinogens (111). The variation in worldwide distribution of different *NAT2* phenotypes suggests that the distribution of the phenotypes correlates with the type of subsistence practice. It has been noted that hunter-gatherers often have high frequencies of the fast phenotype (>77%), while pastoralists and agriculturalists have reduced levels of the phenotype (51-54.9%) (112). The favorable selection of the slow phenotype in modern populations, which is higher in west Eurasians and Africans, compared to hunter-gatherers, Native Americans and east Asians was hypothesized to be related to dietary changes accompanying the transition to agriculture (113, 114). Indeed, in modern Asian populations the distribution of acetylation phenotype has been linked to subsistence strategy with slow phenotype more common among populations of sedentary agriculturalists than the nomadic populations (115)

In order to investigate the status of acetylator phenotype in ancient Siberian individuals we predict the *NAT2* phenotype from seven informative SNPs (rs1801279, rs1801280, rs1799930, rs1799931, rs1041983, rs1799929, rs1208) using an online *NAT2* prediction tool - NAT2PRED (<http://nat2pred.rit.albany.edu>) (116). To confirm the status we further use a tag SNP (rs1495741)

and/or a 2-SNP panel (rs1041983 and rs1801280) (117) which has been suggested to outperform the single tag SNP prediction in non-Caucasian populations (118), but may result in overrepresentation of the intermediate phenotype.

We have used the combination of all three methods to predict the acetylation status in 22 individuals sequenced to genomic coverage above 1X (Table S22). We compare the results obtained from both damage repaired (Table S19) and non-damage repaired libraries (Table S19) using the latter for final predictions due to low impact of observed damages coupled with much higher coverage (especially in irk034) and what follows, increased probability of identification of heterozygotes. We only accept consensus predictions whenever all three prediction tools yielded results and when at least two of the predicted phenotypes matched. Using those criteria we were able to make phenotype predictions in 15 out of 22 tested individuals. We find that a single Mesolithic individual was a carrier of a rapid phenotype, and so were five Neolithic individuals. Only one Neolithic individual was a carrier of an intermediated phenotype while Bronze Age individuals were either intermediate (N=5) or slow acetylators (N=3) (Table S19). Our data suggests that intermediate phenotypes were uncommon in Siberia during the Mesolithic and Neolithic with significant frequency increase during the Bronze Age. Thus, our results are in line with hypothesis suggesting selective pressures associated with transition to agriculture and major change of lifestyle may have shaped present-day distribution of the *NAT2* phenotype in Asia.

### Diet-related SNPs

The ability to digest sugars found in milk into the adulthood, so called lactase persistence, is often regarded as an important cultural adaptation in humans associated with dairy animal domestication. We have tested 22 individuals sequenced to average genome coverage exceeding 1X for the two SNPs most commonly associated with the trait: LCTa (rs4988235 - "C/T(-13910)", (119) and LCTb (rs182549 - "G/A(-22018)"; (120) as well as other variants associated with lactase persistence which could be more common in individuals of non-European descent: rs41380347 - "C/T(-13915)" (East Asia), rs41525747 - "C/G(-13907)" (East/North Africa and Middle East) and rs145946881 - "G/C-14010" (East Africa) (121). However, we find no evidence of lactase persistence in the 22 tested ancient Siberians.

Another variant, potentially associated with the spread of agriculture is the derived status of *ADH1B\*47His* which among other associations has been linked to alcohol metabolism in East Asians and the so-called 'Asian blush'. It has been suggested that prevalence of derived *ADH1B\*47His* could be explained by the increased alcohol consumption in connection to Neolithic rice domestication (114). None of the tested individuals was a carrier of the derived (A) allele at position rs1229984. Additionally, the lack of derived alleles (A) at the *ALDH2* rs671 suggests absence of Asian flush and reduced hangovers in all 22 individuals. Thus, present-day distribution of *ADH1B\*47His* and characteristic distribution of alcohol metabolism associated variants among Asian populations was shaped in more recent times.

#### Other phenotypic traits

We have tested all individuals for a number of SNPs associated with various phenotypic traits such as *AGT* gene, associated with increased risk of hypertension (122); *KITLG* gene, associated with UV protective tanning in lighter skinned individuals (123); *CYP3A4* and *CYP3A5* associated with certain cancers and drug metabolism (124, 125); *EDAR* gene, associated with incisor and hair shape as well as Asian ancestry (126), *ABCC1* gene associated with various phenotypic traits as well as Asian ancestry (127), and finally, *C282Y* and *H63D* variant in *HFE* gene associated with hereditary haemochromatosis.

We only find variation in *AGT*, *KITLG*, *EDAR*, *ABCC1* and *CYP3A5* genes. While the different variants and incidence of heterozygotes in *AGT* and *KITLG* is spread out among various groups and time periods and likely represents population variation, it seems that the increase in heterozygosity in *ABCC1* and *EDAR* genes is mostly restricted to Neolithic and Bronze Age individuals from Cis-Baikal group. On *EDAR* we observed increased occurrence of (A) on otherwise widespread (G) variant associated with straight hair and shovel shaped incisors (note that the phenotypic representation of heterozygotes would be the same), while four individuals were heterozygous on *ABCC1* gene, otherwise all tested individuals were homozygotes for variant T associated with Asian ancestry. Thus, it seems that on some phenotype encoding SNPs we detect signal of western admixture in Cis-Baikal during the Neolithic and Bronze Age.

#### Blood type

ABO and Rh blood group system are a set of genetic markers which has been used in the study of human genetic variation for decades and presents distinct geographic distribution (110, 128). In order to investigate blood group variation in our dataset we followed a strategy for blood group prediction adopted in (129) and checked 22 individuals at five SNPs within the ABO gene region: rs8176719 (G/-), rs7853989 (C;C/G;G), rs8176746 (C;C/A;A), rs8176747 (G;G/C;C) and rs590787 (C;C/T;T) (130)

It was possible to make broad blood group inferences in 19 of the tested individuals of which four were phenotypically carriers of blood group ARh+, while remaining 15 individuals were probable carriers of ORh+. Both phenotypes are common in present-day Asia, especially ORh+, however seeing that we only identify ARh+ in Mesolithic and Neolithic individuals in our dataset and not among more numerous Bronze Age samples could potentially suggest that ARh+ was more widespread in earlier periods and declined in frequency sometime during or after the Neolithic.

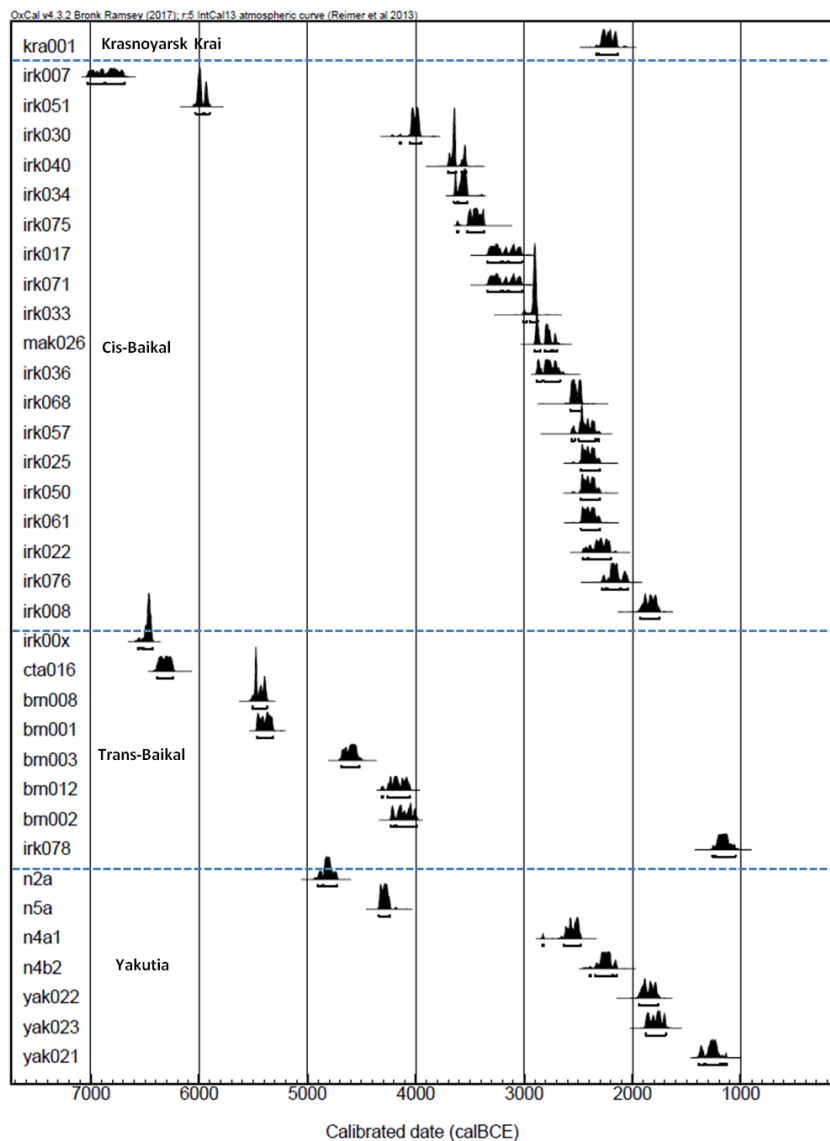

**Fig. S1**

**Radiocarbon dates of the studied samples.** Samples excluded from the comparison are yak025 (Khairyrgas-1), irk032, yak030, and bla001. yak024 (Kamenka-3) could not be dated due too poor quality of the sample but it was found in the same burial with yak022 (Kamenka-1) and yak023 (Kamenka-2). Full data was presented in Table S1.





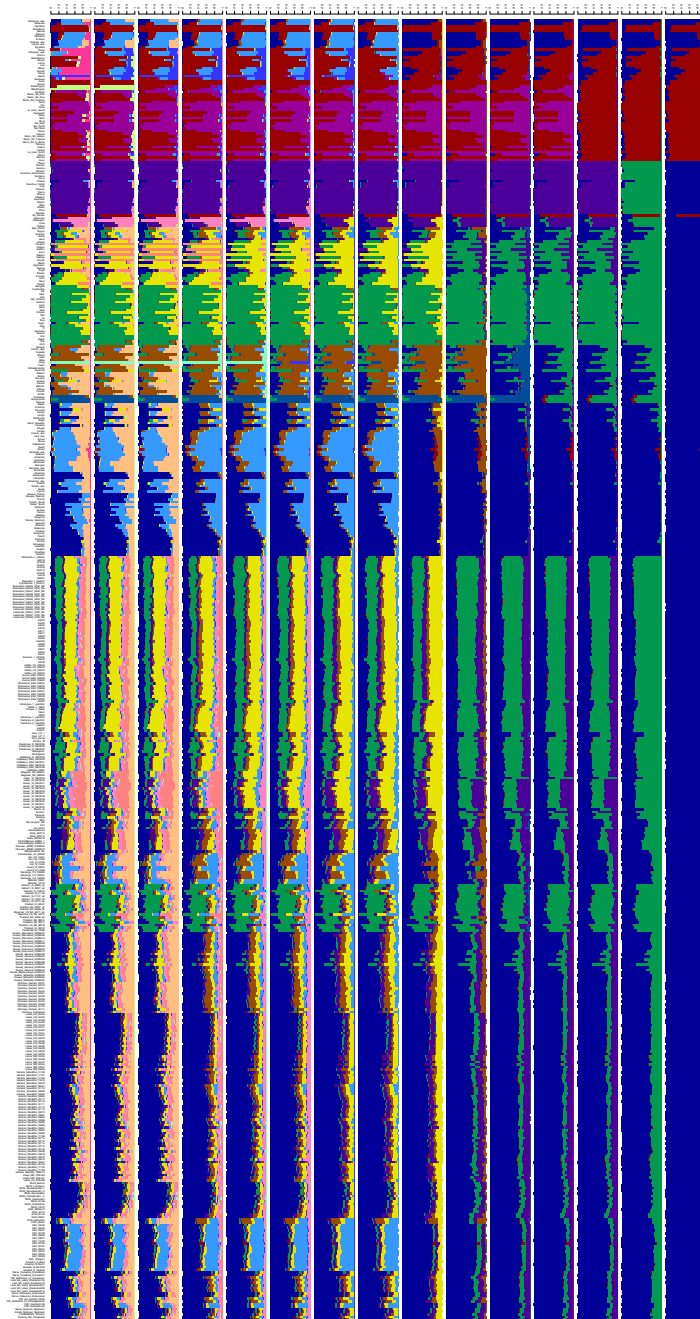

**Fig. S3**

**ADMIXTURE analysis for K=2 to K=16.** Final results for each K which was obtained by running CLUMPP on 30 independent runs per K was plotted in R. Color codes which were used for plotting are presented in table S4. R library "RColorBrewer" was used to create that color vector (table S4).



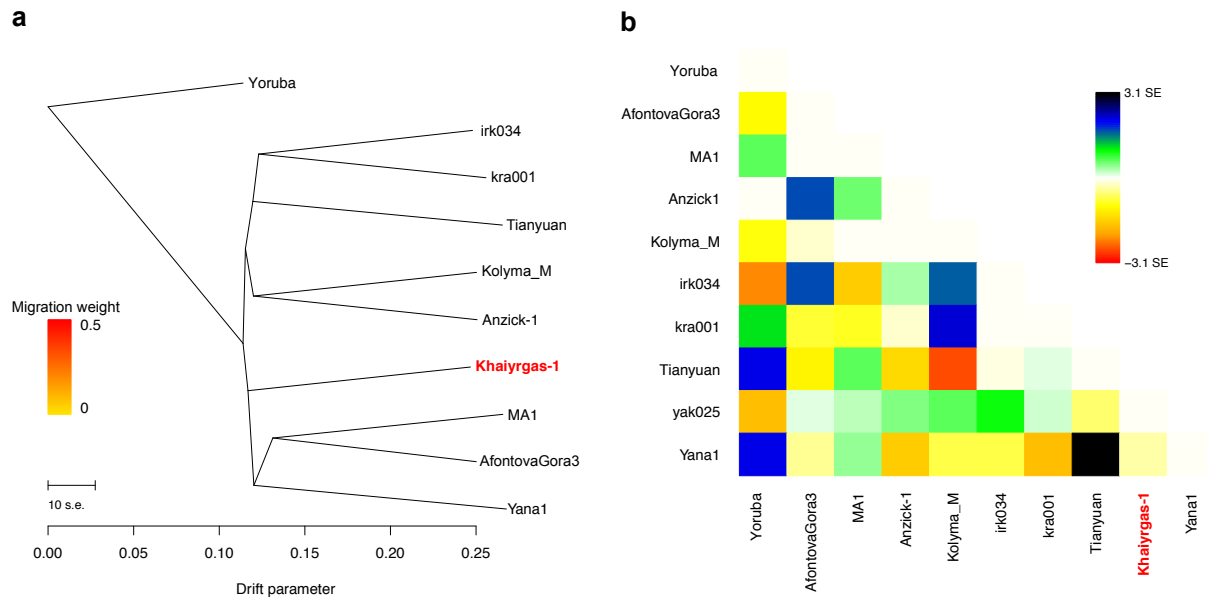

**Fig. S5.**

**Admixture graph fitting using Treemix. (a)** A maximum likelihood tree for a model which allows for zero migration and **(b)** Pairwise residual matrix in which large values imply a poor fit for the indicated population pairs.

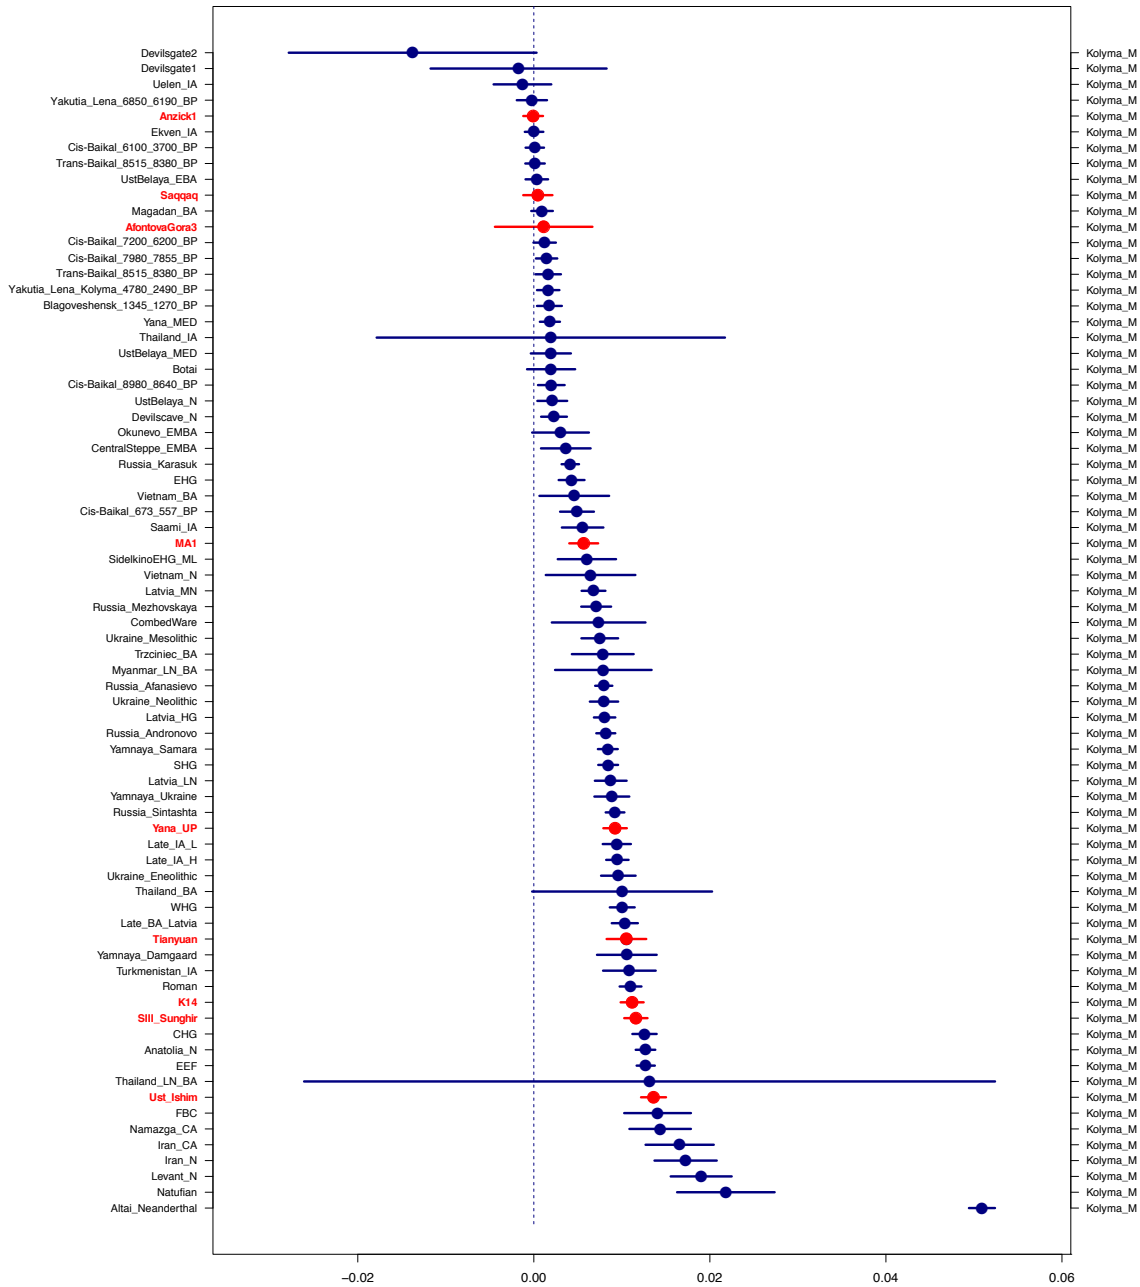

**Fig. S6**

**$F_4$ -statistics for  $f_4(\text{Yoruba}, \text{Khairgas-1}; \text{TestPop}_x, \text{Kolyma}_M)$ .** Results were plotted with two se intervals for the tree like topology of  $f_4(\text{Yoruba}, \text{Khairgas-1}; \text{TestPop}_x, \text{Kolyma}_M)$  in which TestPop<sub>x</sub> corresponds to one of the ancient groups on the left y-axis (table S6).

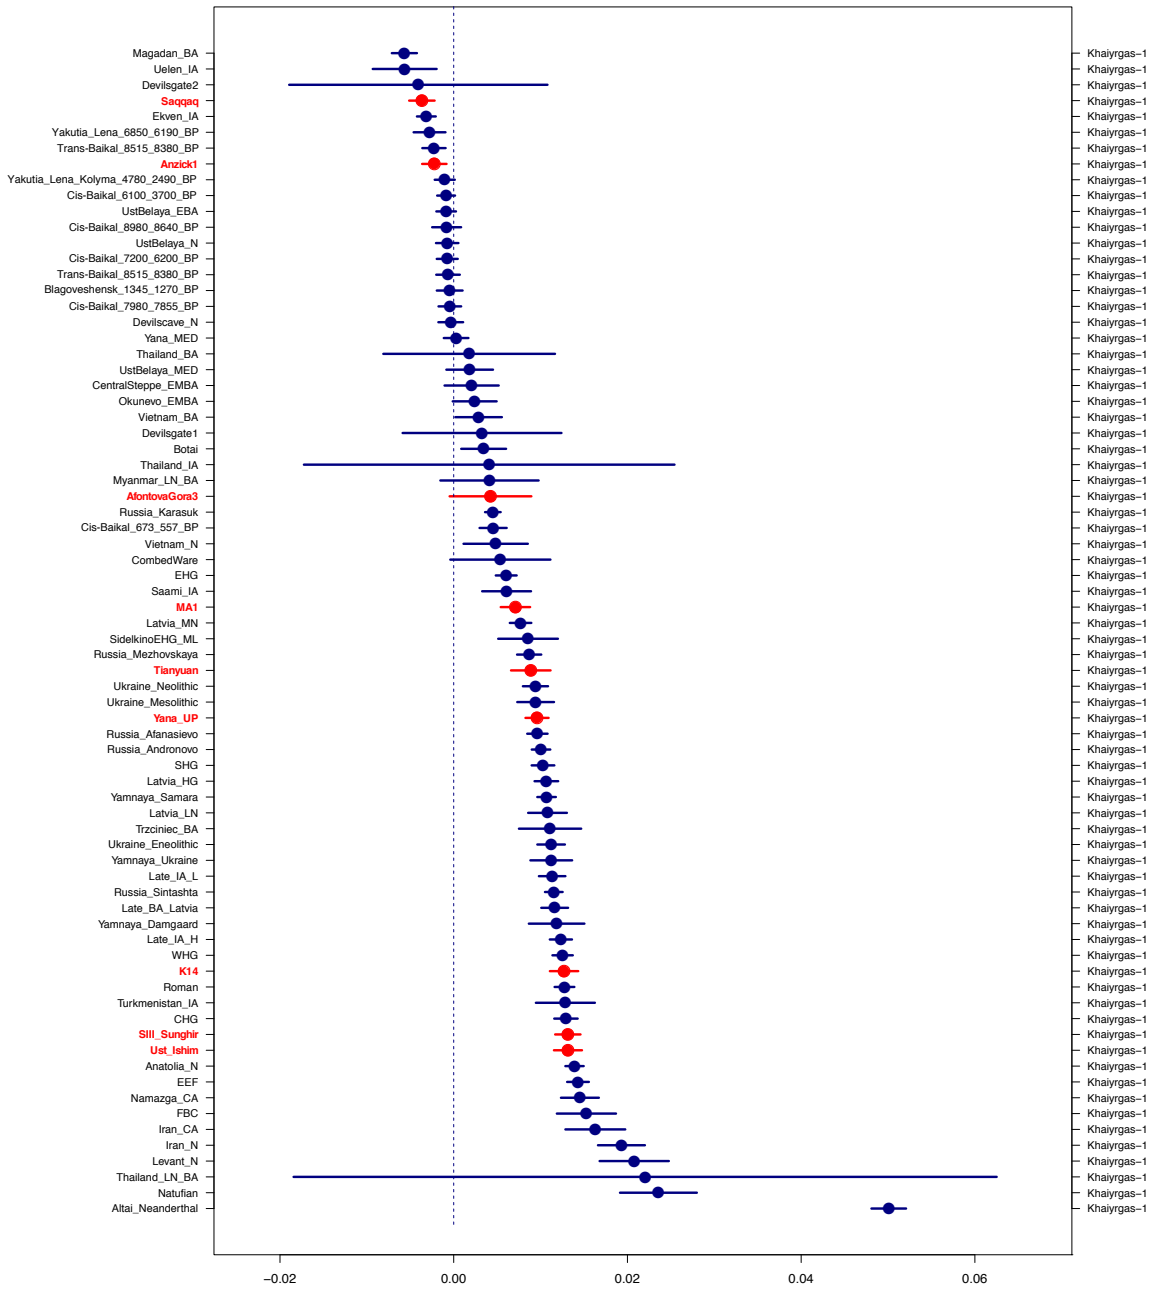

**Fig. S7**

**$F_4$ -statistics for  $f_4(\text{Yoruba}, \text{Kolyma}_M; \text{TestPop}_x, \text{Khaiyrgas-1})$ .** Result were plotted with two se intervals for the tree like topology of  $f_4(\text{Yoruba}, \text{Kolyma}_M; \text{TestPop}_x, \text{Khaiyrgas-1})$  in which TestPop<sub>x</sub> corresponds to one of the ancient groups on the left y-axis (table S6).

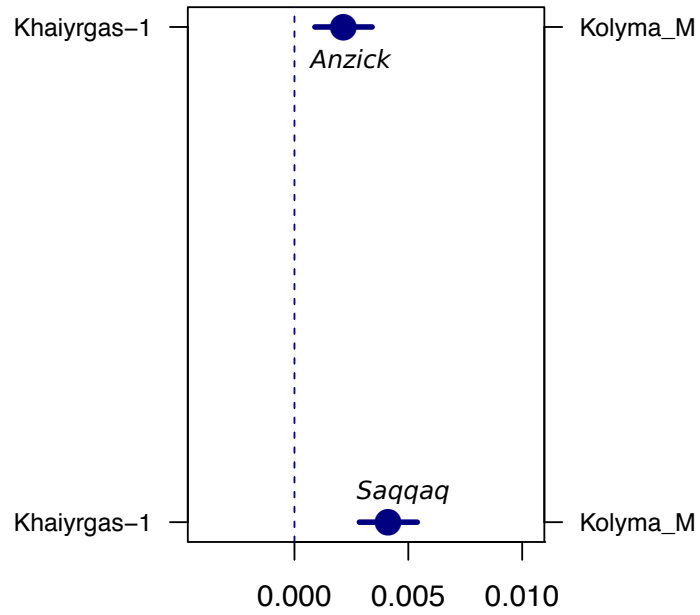

**Fig. S8**

*$F_4$ -statistics for  $f_4(\text{Yoruba, Anzick-1}; \text{Khaiyrgas-1, Kolyma\_M})$  and  $f_4(\text{Yoruba, Saqqaaq}; \text{Khaiyrgas-1, Kolyma\_M})$ . Result plotted with two se intervals for the tree like topologies in the form of  $f_4(\text{Yoruba, Anzick-1}; \text{Khaiyrgas-1, Kolyma\_M})$  and  $f_4(\text{Yoruba, Saqqaaq}; \text{Khaiyrgas-1, Kolyma\_M})$ .*

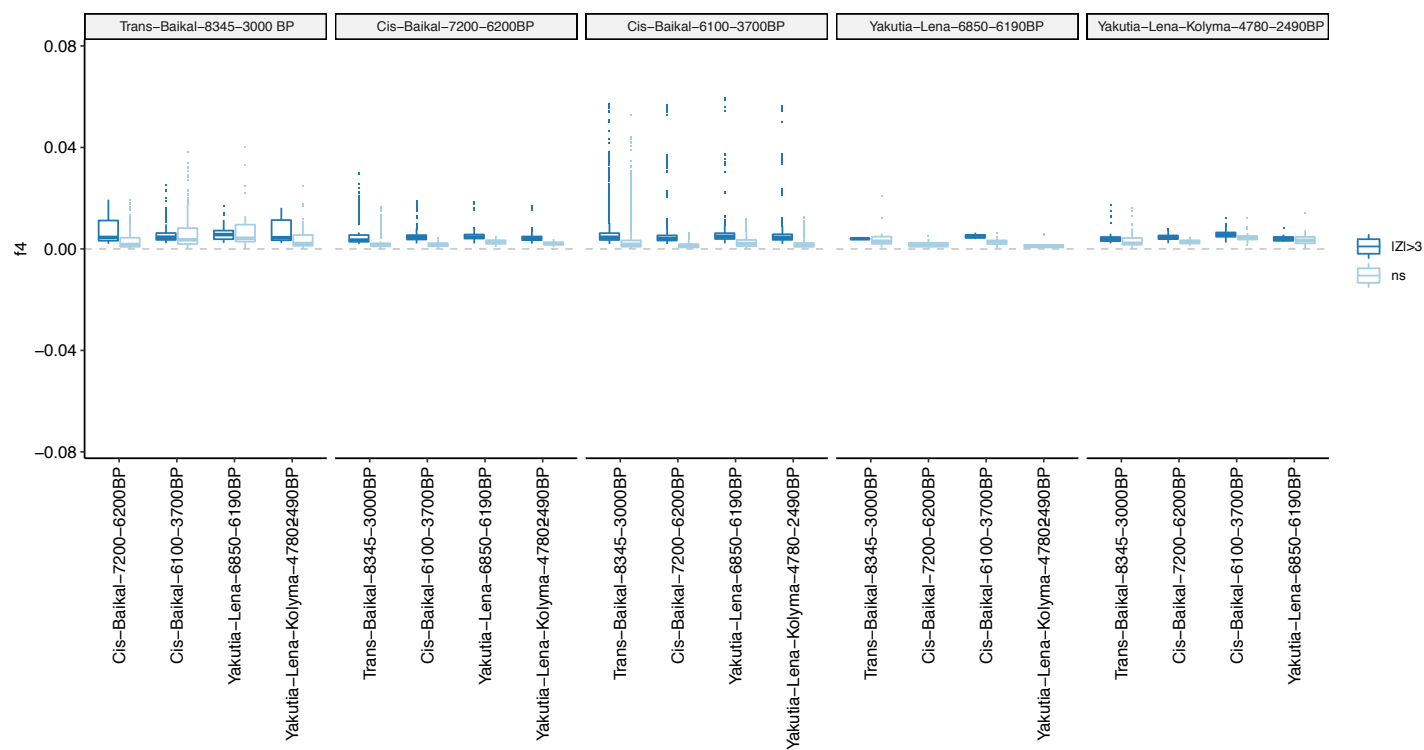

**Fig. S9**

**$F_4$ -statistics to formally test grouping of individuals on PCA.** Tests were run for tree-like topology of  $f_4(\text{Yoruba}, \text{ind}_{x1..n\text{group}_x}; \text{ind}_{y1..n\text{group}_y}, \text{ind}_{x1..n\text{group}_x})$ . Each individual shared more alleles with individuals from the same group compared to the individuals from other groups ( $Z > |3|$ ).



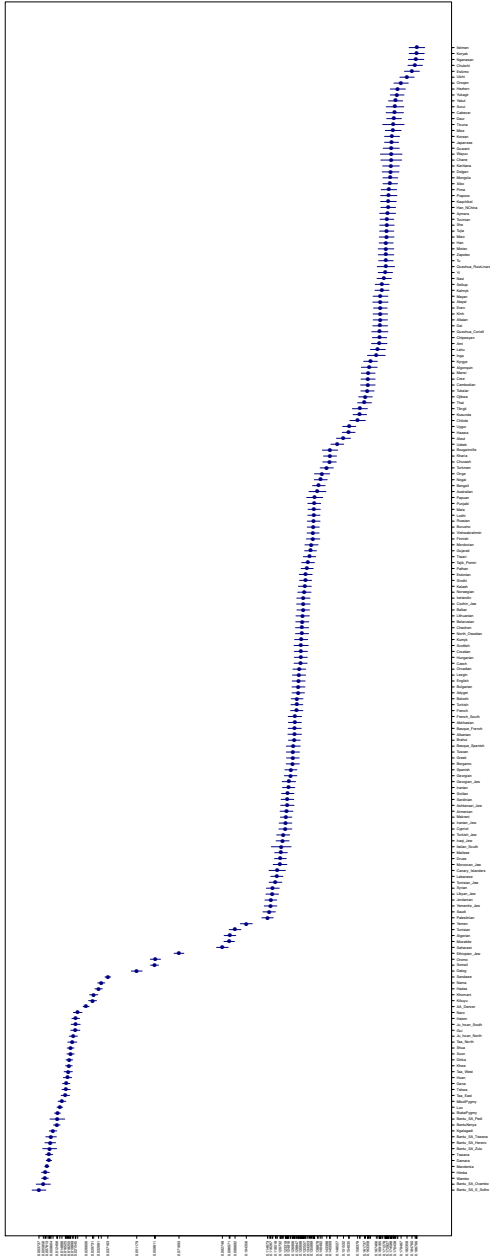

**Fig. S10**

**Outgroup  $f_3$ -statistics for *Yakutia\_Lena\_6850\_6190\_BP*.** Plot showing the  $f_3$ -statistics in the form of  $f_3(\text{Yakutia\_Lena\_6850\_6190\_BP}, \text{Test\_Population}, \text{Yoruba})$  plotted with two se. Test population is one of the 194 present-day world populations from Human Origins dataset (table S7).



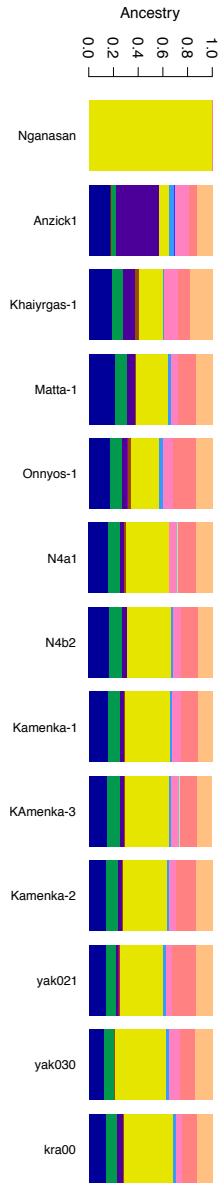

**Fig. S12**

**Northeast Asia- and Native America-related genetic components.** A subset of ADMIXTURE analysis results for K=14 ancestral clusters for Yakutia individuals compared to Native American populations (Anzick1, purple component) and Northeast Asia populations (Nganasan, yellow component).

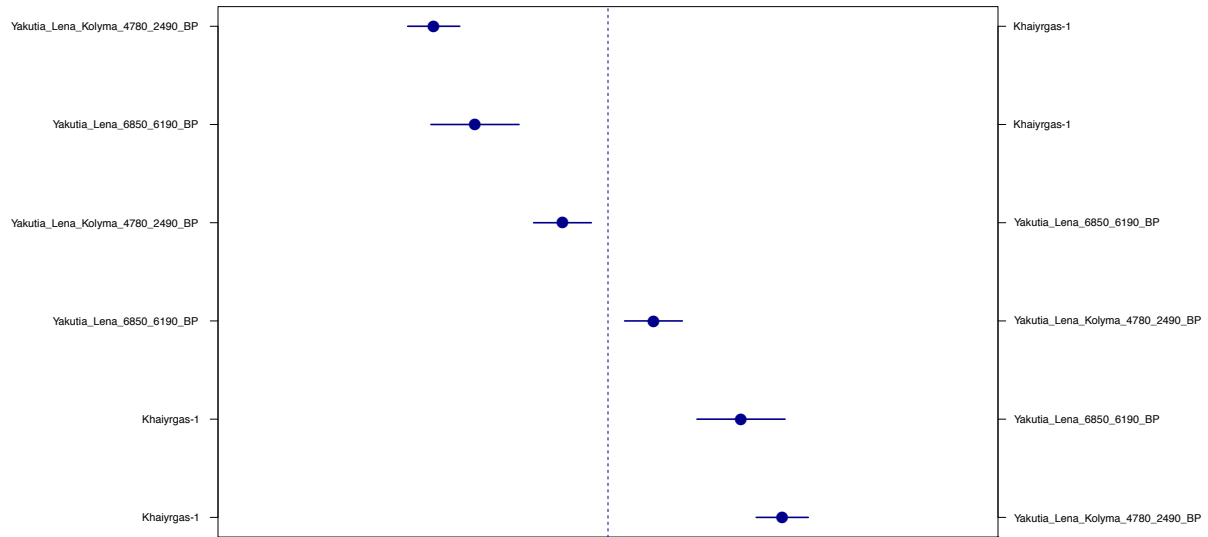

**Fig. S13**

***F<sub>4</sub>***-statistics for  $f_4(\text{Yoruba}, \text{Devil's Cave}; \text{YakutiaPopX}, \text{YakutiaPopY})$ . Result plotted with two standard se intervals for the tree like topologies in the form of  $f_4(\text{Yoruba}, \text{Devil's Cave}; \text{YakutiaPopX}, \text{YakutiaPopY})$  in which YakutiaPopX, YakutiaPopY corresponds to one of the ancient Yakutia groups (table S9).

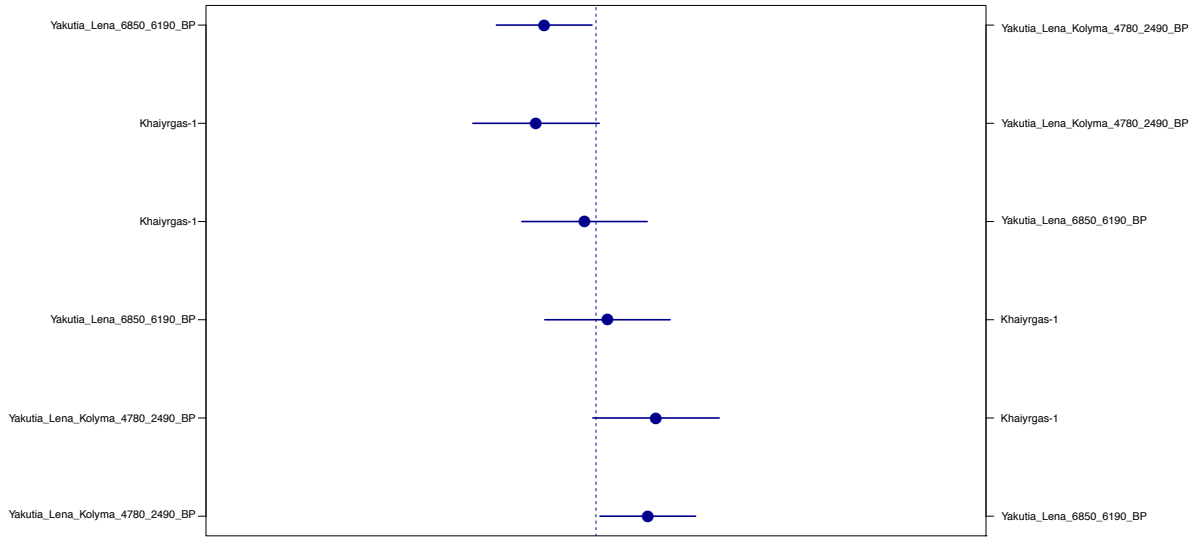

**Fig. S14**

**$F_4$ -statistics for  $f_4(\text{Yoruba}, \text{Anzick-1}; \text{YakutiaPopX}, \text{YakutiaPopY})$ .** Result plotted with two se intervals for the tree like topologies in the form of  $f_4(\text{Yoruba}, \text{Anzick-1}; \text{YakutiaPopX}, \text{YakutiaPopY})$  which YakutiaPopX, YakutiaPopY corresponds to one of the ancient Yakutia groups. (table S9).

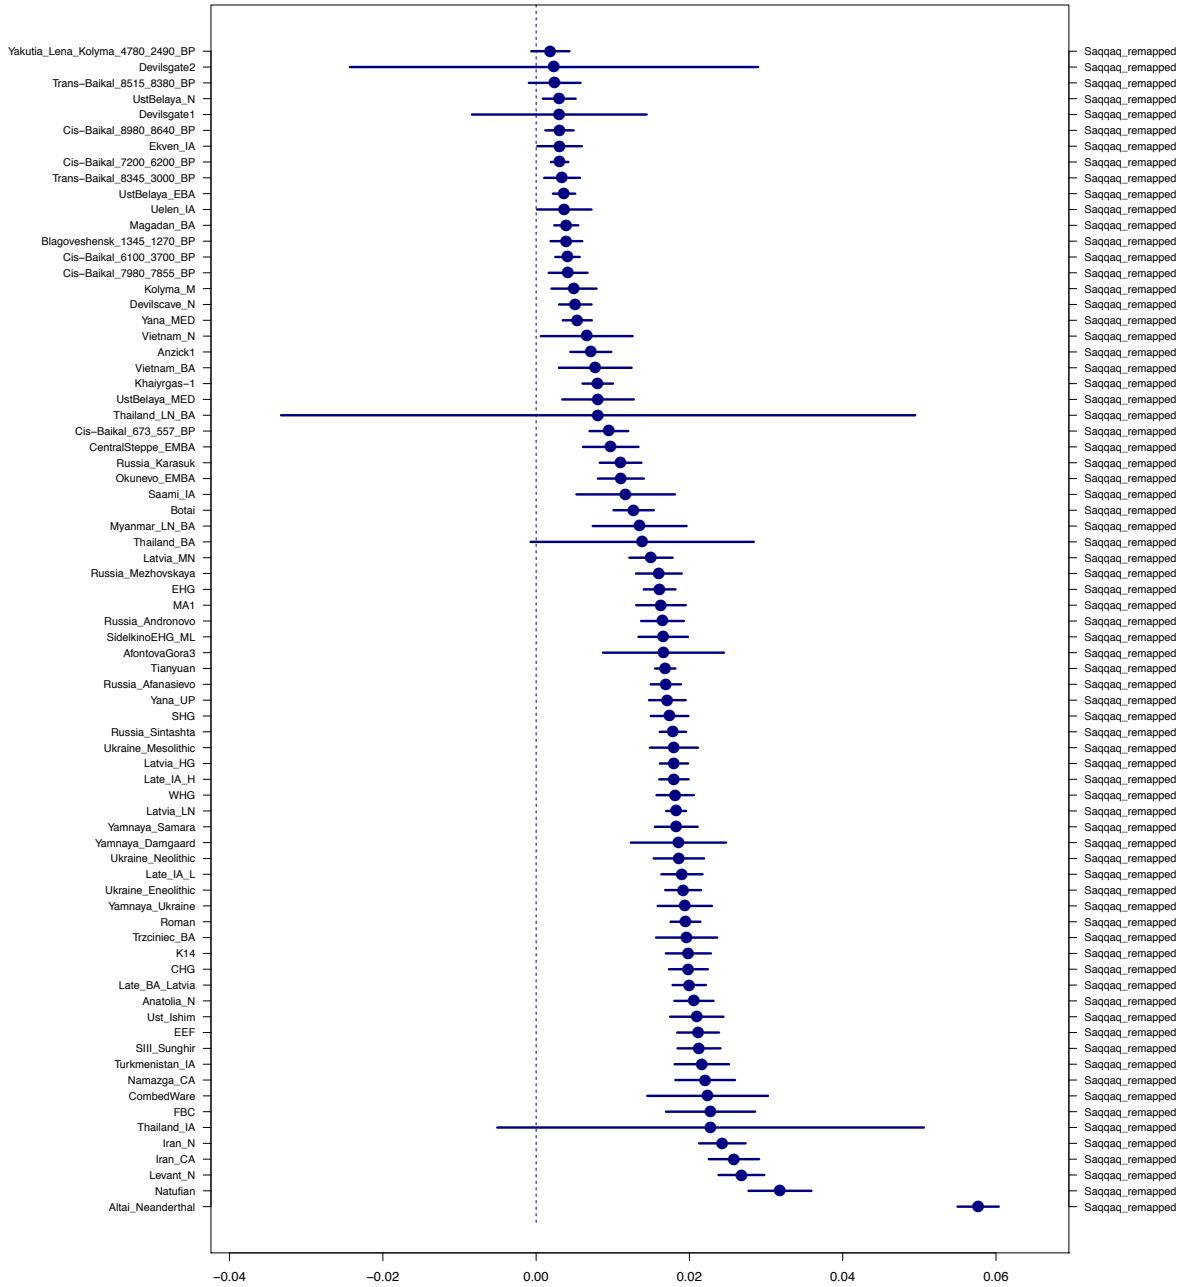

**Fig. S15**

**$F_4$ -statistics for  $f_4(\text{Yoruba}, \text{Yakutia\_Lena\_6850\_6190\_B}; \text{PopX}, \text{Saqqaq})$ .** Result plotted with two se intervals for the tree like topology in the form of  $f_4(\text{Yoruba}, \text{Yakutia\_Lena\_6850\_6190\_BP}; \text{PopX}, \text{Saqqaq})$  where PopX corresponds to one of the ancient groups (table S10).

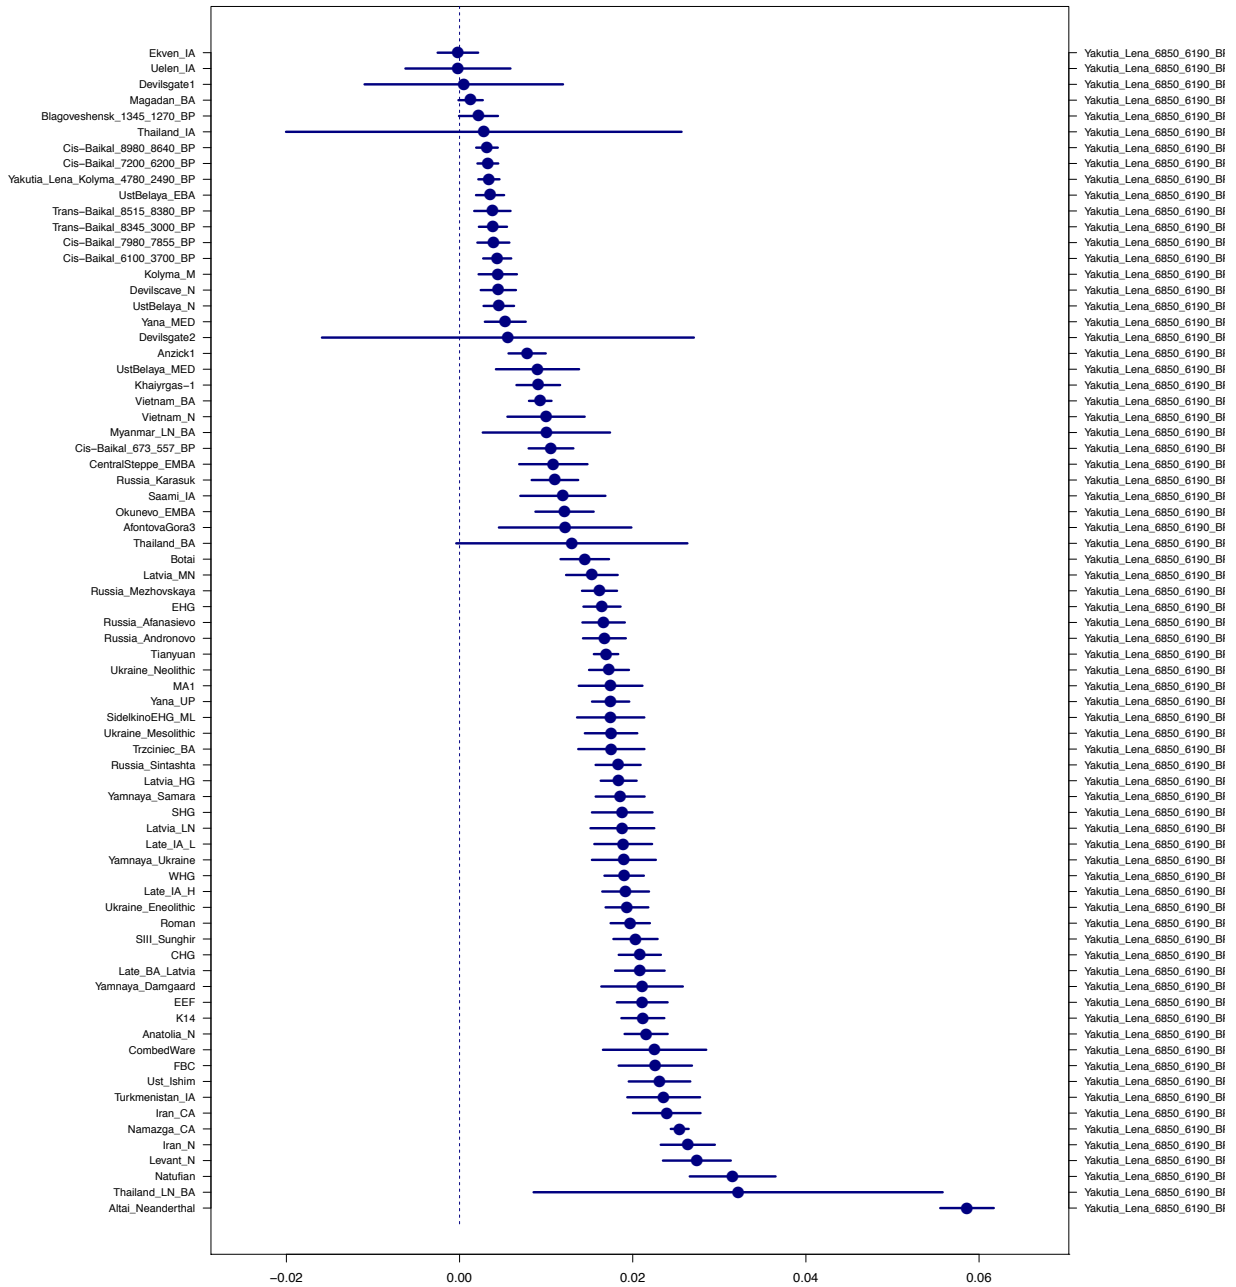

**Fig. S16**

**$F_4$ -statistics for  $f_4(\text{Yoruba}, \text{Saqqaq}; \text{PopX}, \text{Yakutia\_Lena\_6850\_6190\_BP})$ . Result plotted with two se intervals for the tree like topology in the form of  $f_4(\text{Yoruba}, \text{Saqqaq}; \text{PopX}, \text{Yakutia\_Lena\_6850\_6190\_BP})$  where PopX corresponds to one of the ancient groups (table S10).**

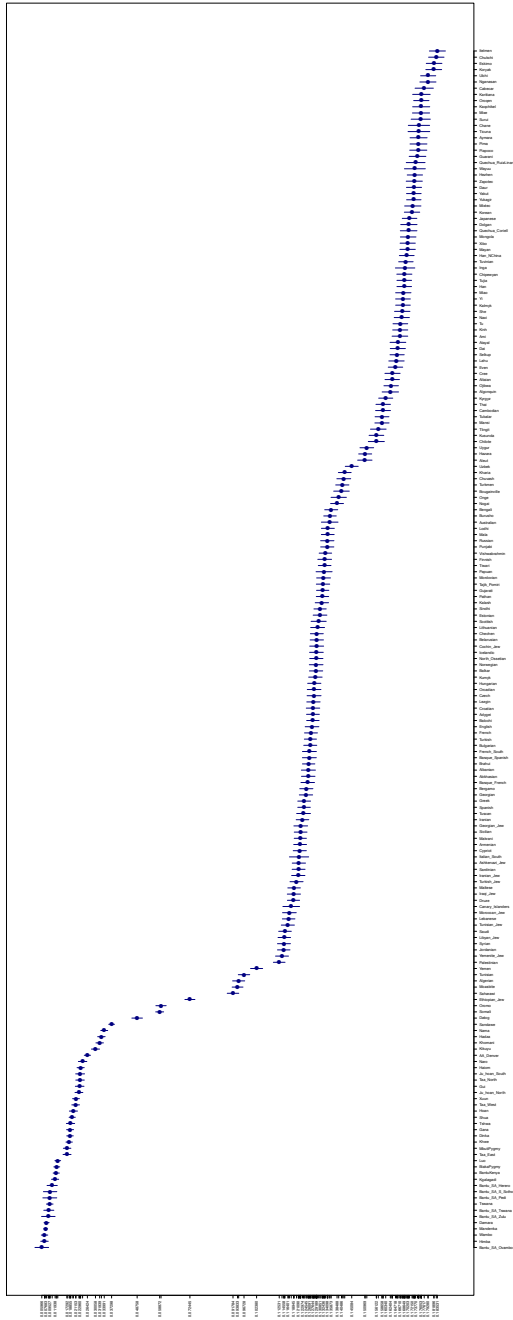

**Fig. S17**

**Outgroup  $f_3$ -statistics for Dzyhlinda-1.** Plot showing the  $f_3$ -statistics in the form of  $f_3(\text{Dzyhlinda-1}, \text{Test\_Population}, \text{Yoruba})$  plotted with two se. Test population is one of the 194 present-day world populations from Human Origins dataset (table S12).



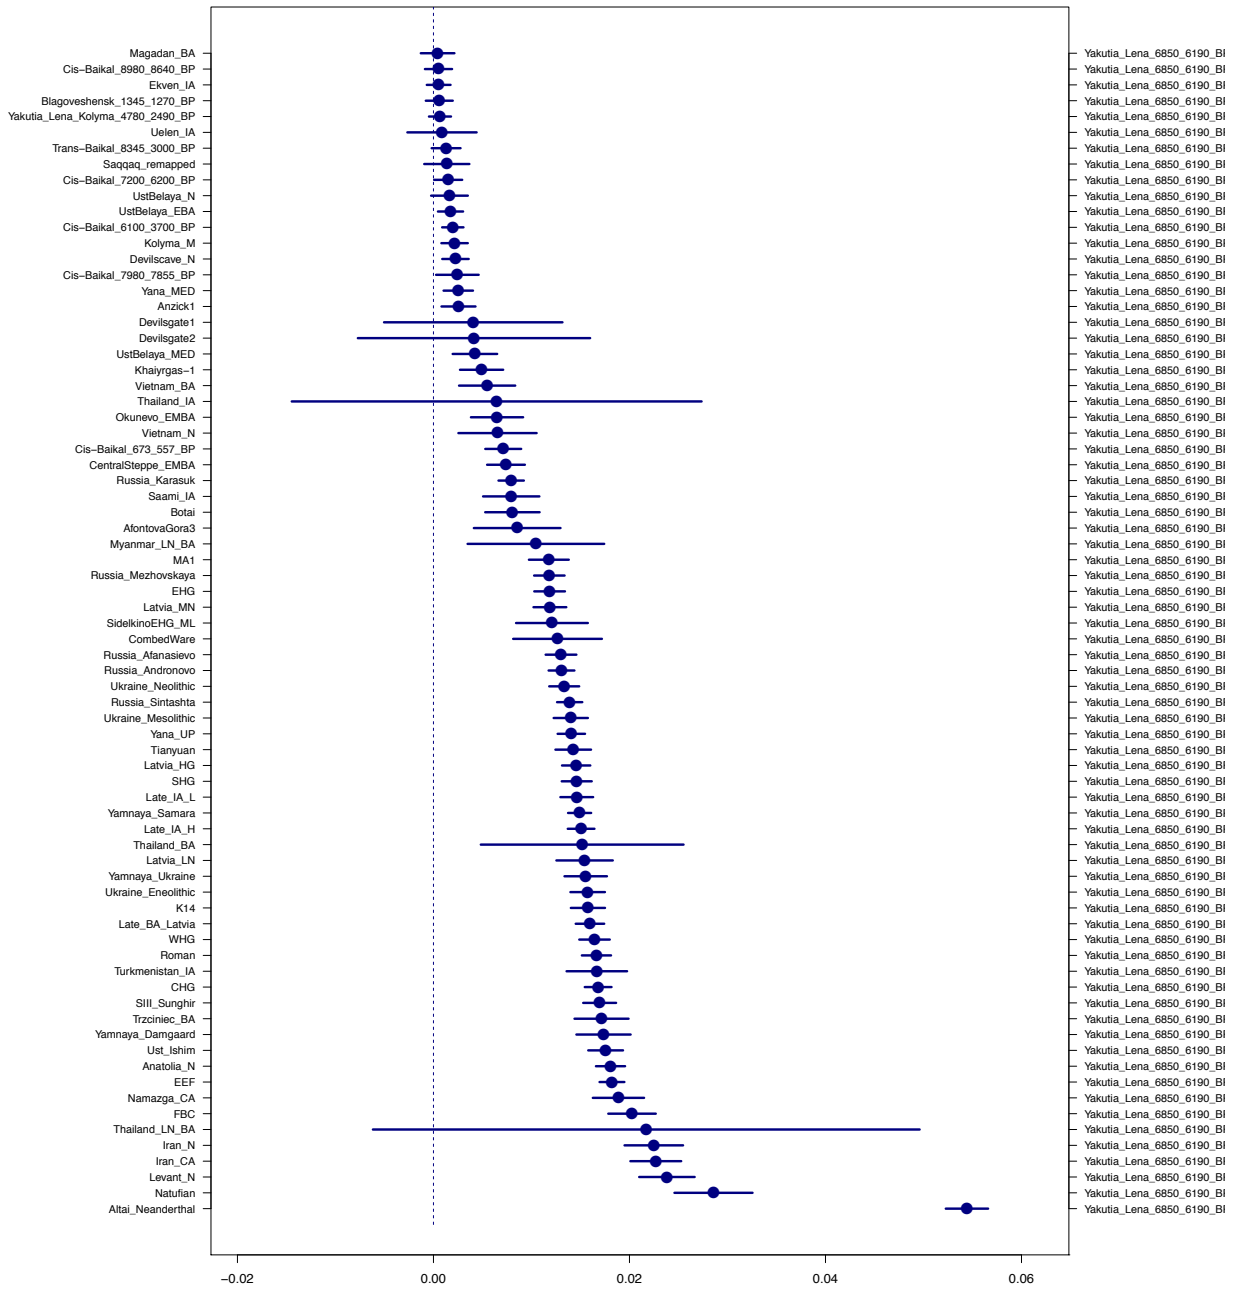

**Fig. S18**

**$F_4$ -statistics for  $f_4(\text{Yoruba}, \text{Dzyhlynda-1}; \text{PopX}, \text{Yakutia\_Lena\_6850\_6190\_BP})$ . Result plotted with two se intervals for the tree like topology in the form of  $f_4(\text{Yoruba}, \text{Dzyhlynda-1}; \text{PopX}, \text{Yakutia\_Lena\_6850\_6190\_BP})$  where PopX corresponds to one of the ancient groups (table S13).**

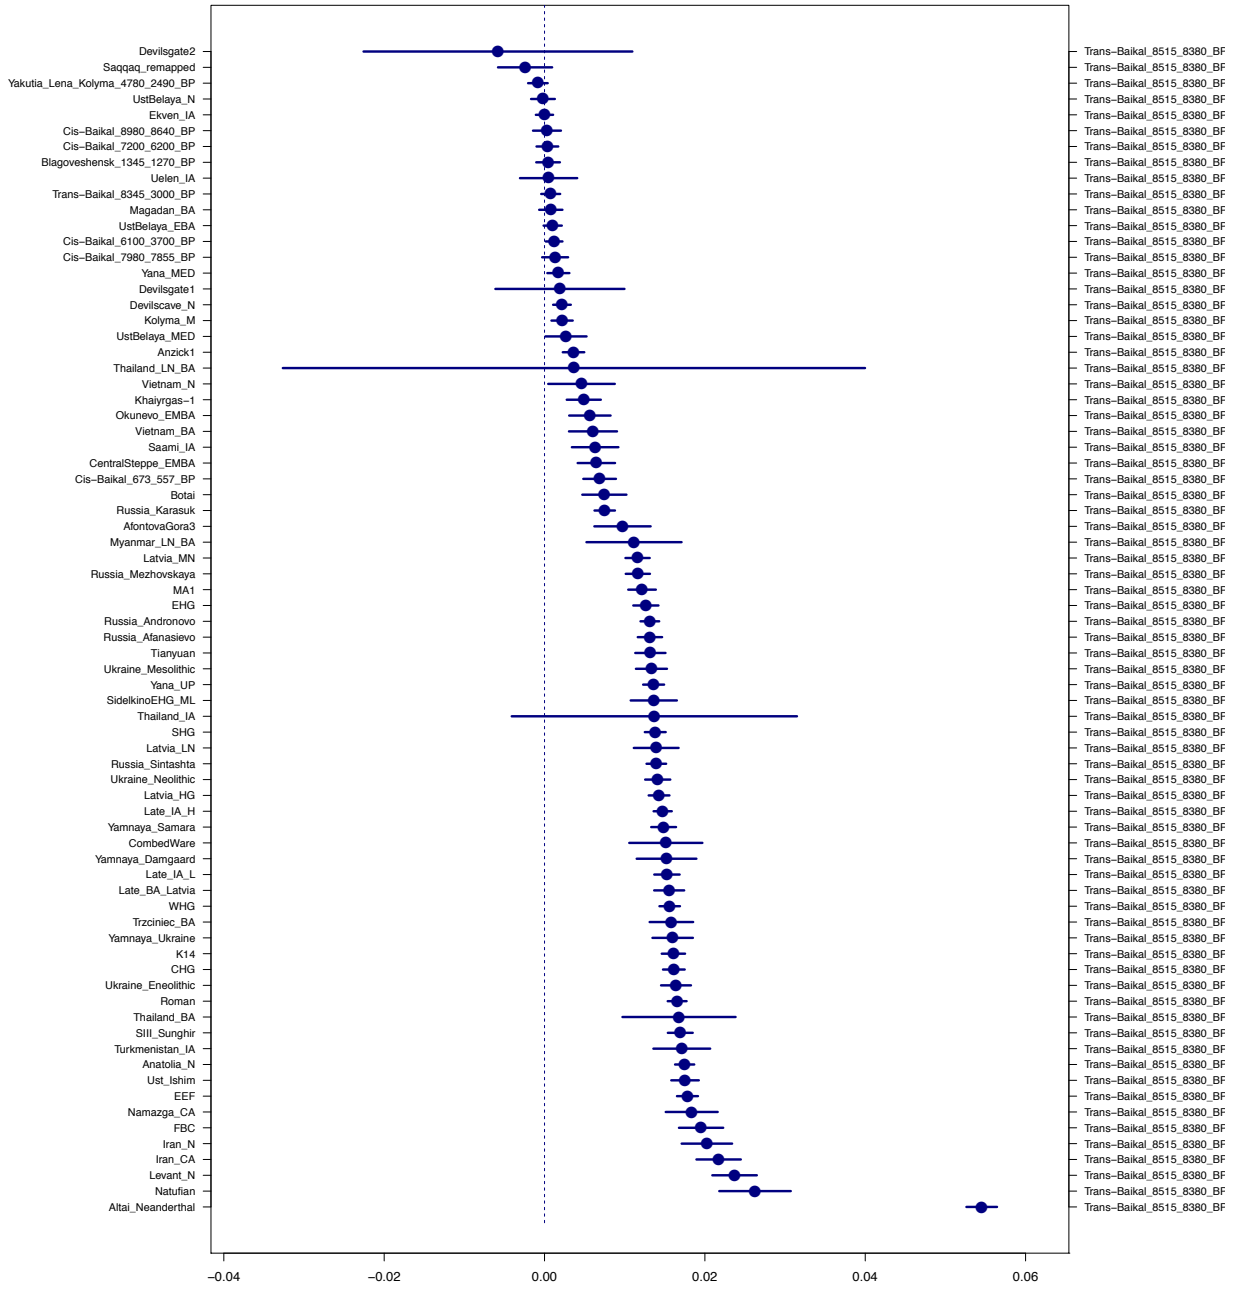

**Fig. S19**

**$F_4$ -statistics for  $f_4(\text{Yoruba}, \text{Yakutia\_Lena\_6850\_6190\_BP}; \text{PopX}, \text{Dzyhlinda-1})$ . Result plotted with two se intervals for the tree like topology in the form of  $f_4(\text{Yoruba}, \text{Yakutia\_Lena\_6850\_6190\_BP}; \text{PopX}, \text{Dyhlinda-1})$  where PopX corresponds to one of the ancient groups (table S13).**

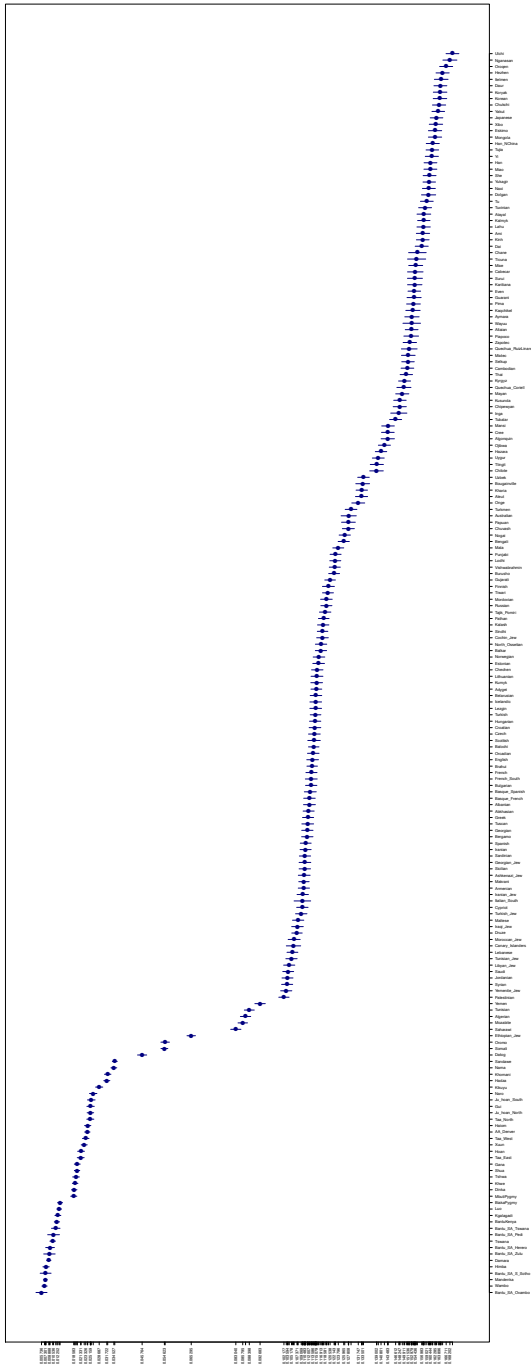

**Fig. S20**

**Outgroup  $f_3$ -statistics for *Trans-Baikal\_8345\_3000\_BP*.** Plot showing the  $f_3$ -statistics in the form of  $f_3(\text{Trans-Baikal\_8345\_3000\_BP}; \text{Test\_Population}, \text{Yoruba})$  plotted with two se. Test population is one of the 194 present-day world populations from Human Origins dataset (table S14).

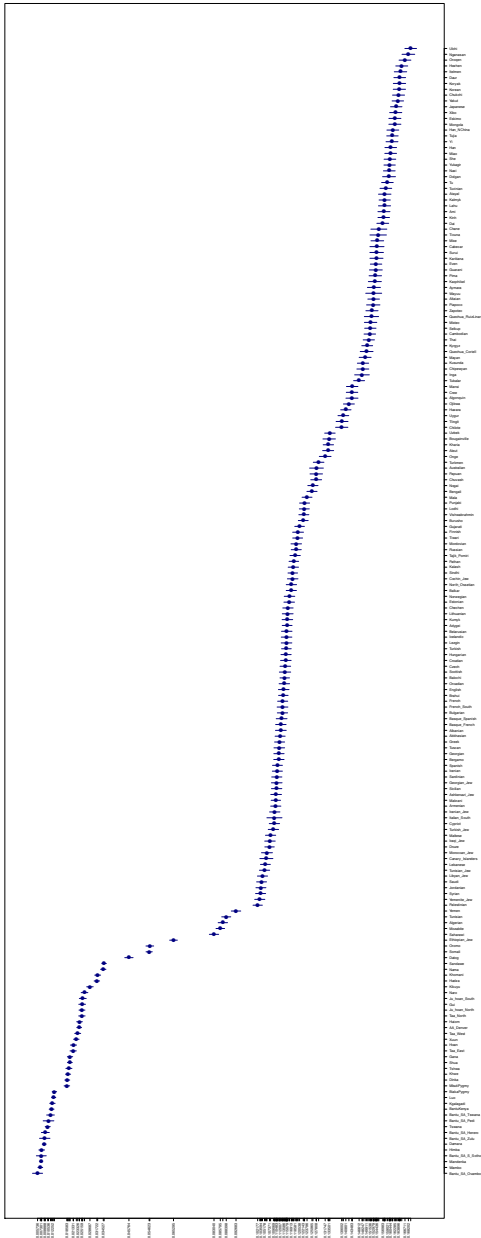

**Fig. S21**

**Outgroup  $f_3$ -statistics for *bla001*.** Plot showing the  $f_3$ -statistics in the form of  $f_3(\text{bla001}, \text{Test\_Population}, \text{Yoruba})$  plotted with two standard errors (se). Test population is one of the 194 present-day world populations from Human Origins dataset (table S16).

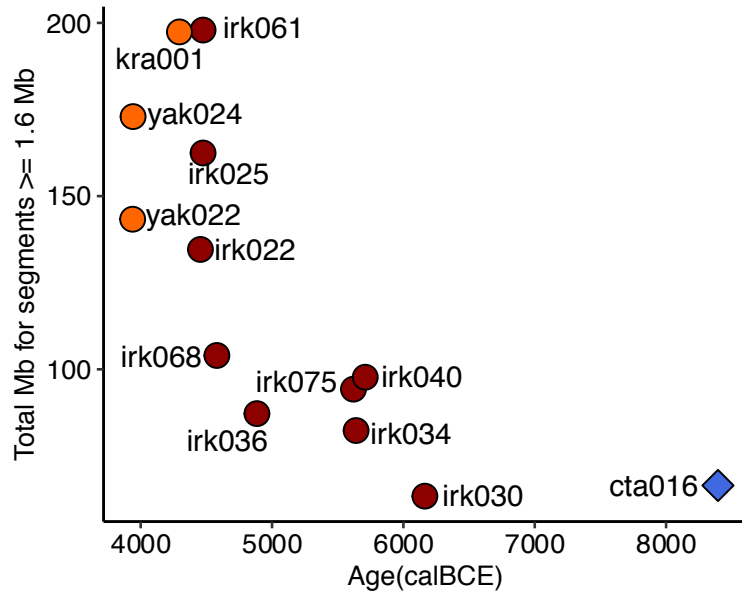

**Fig. S22**

**Distribution of long Runs of Homozygosity.**

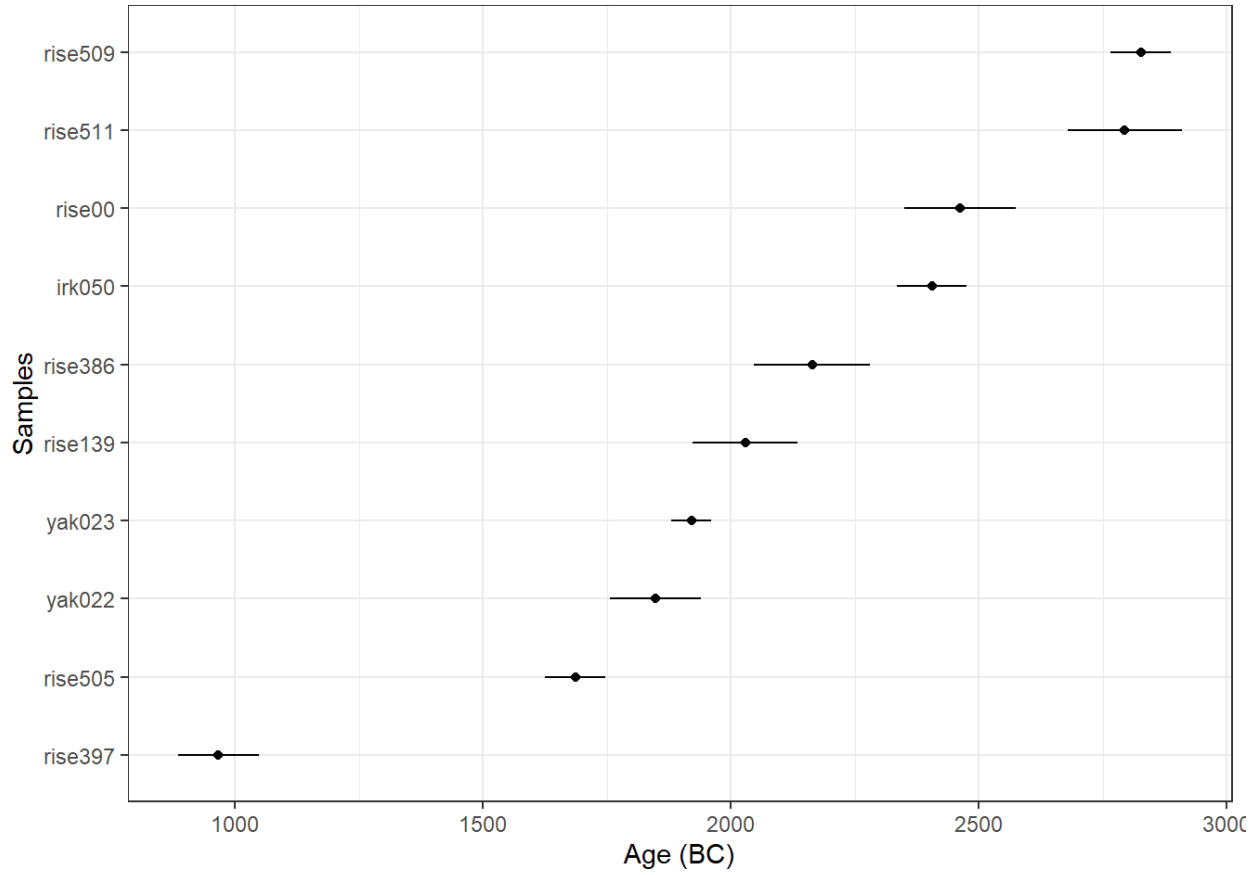

**Fig. S23**

**Overview of the analyzed individuals with *Y. pestis*.** Radiocarbon dates are compiled from (37). Rise509 and Rise511 contains the oldest *Y. pestis* genomes in Asia (found in Afanasievo Gora cultural site). Dates are shown in BCE.

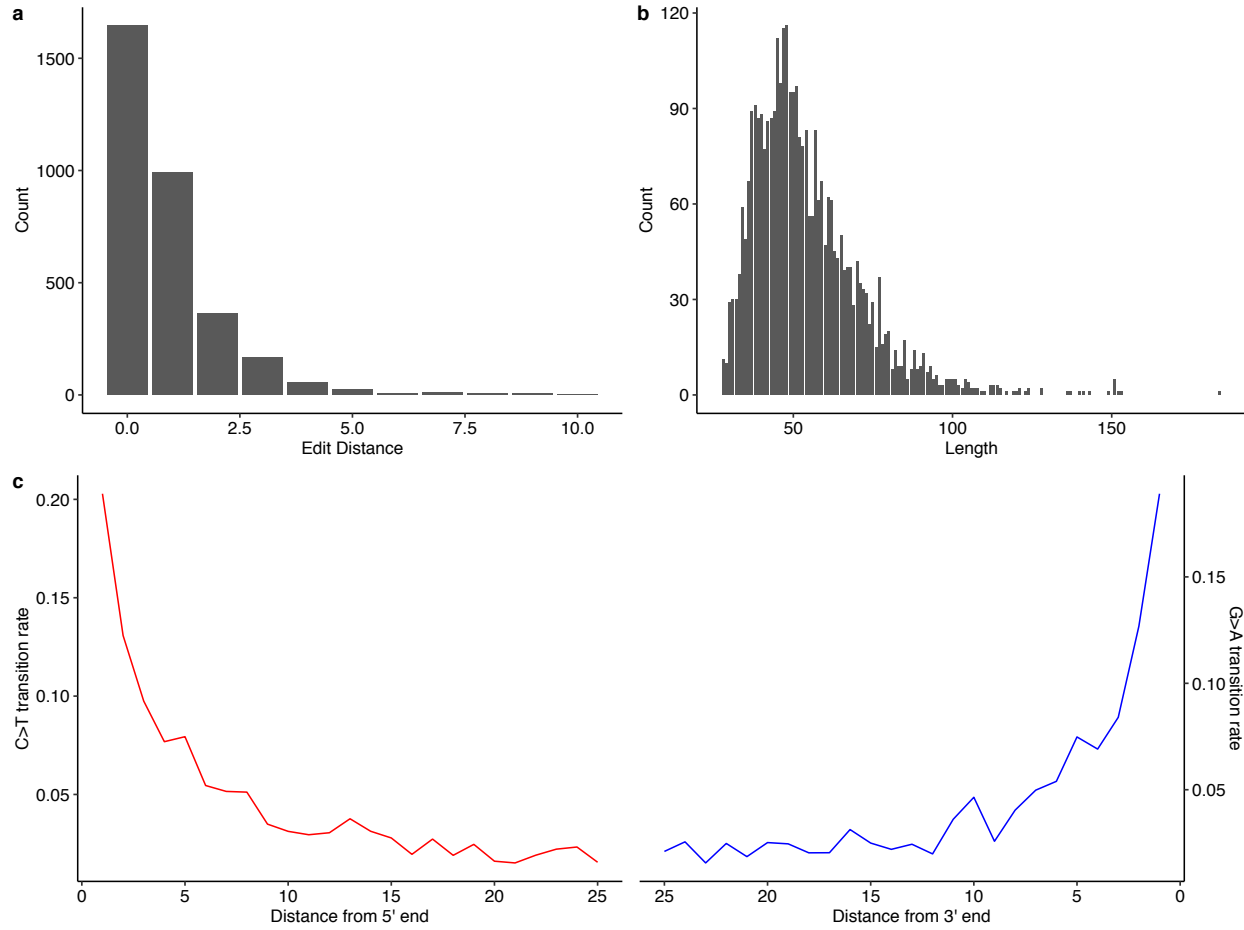

**Fig. S24**

**Summary for *Y. pestis* analysis in Anosovo-1.** (a) The edit distance (less than 10 are shown in the plot), (b) length distribution observed from the reads that are aligned to *Y. pestis* CO92 reference genome in the Anosovo-1, (c) Nucleotide misincorporation patterns.

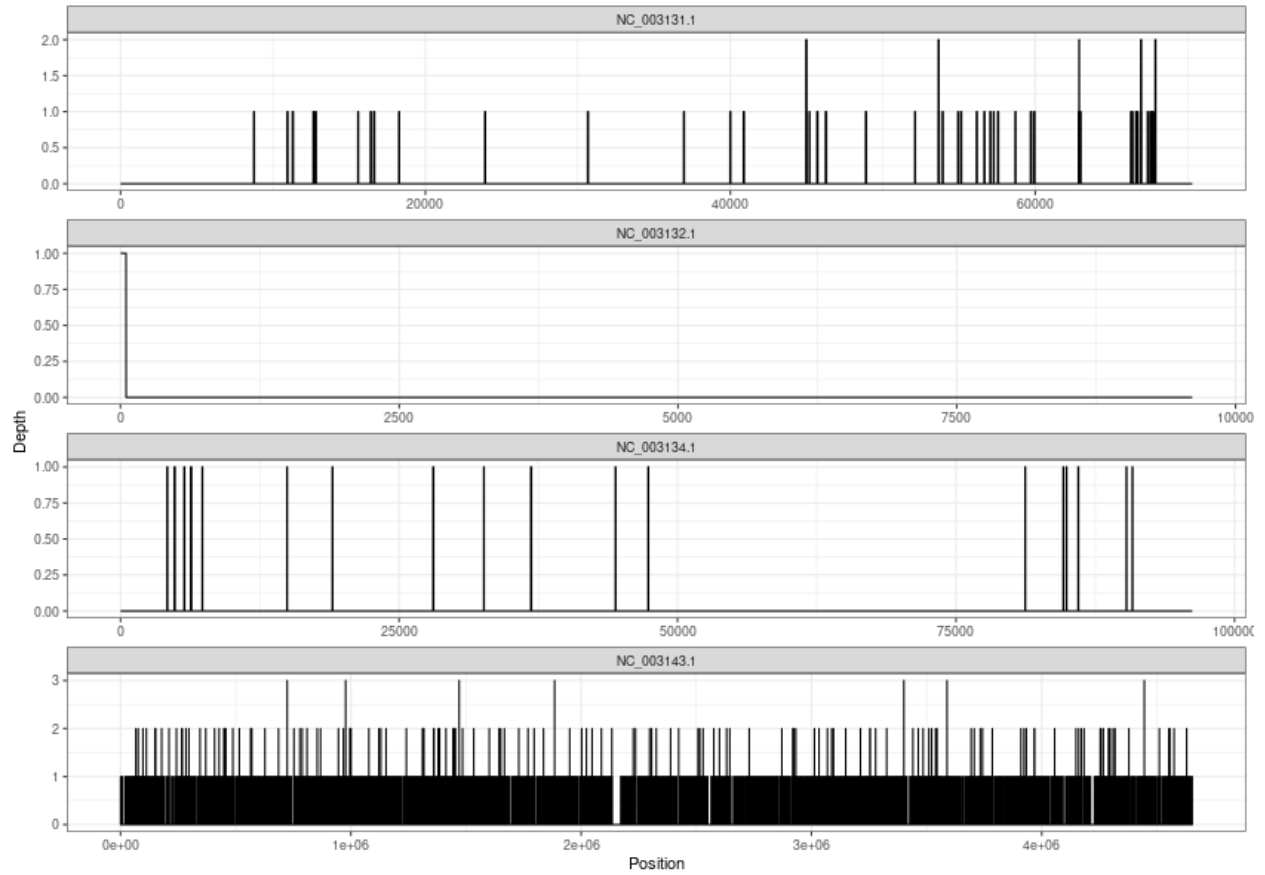

**Fig. S25**

**The coverage distribution among the sequences in *Y. pestis* genome from the Anosovo-1.**

Please note that this plot is to demonstrate the distribution of the coverage among the genomes.

Because of the limited space on the X axis, the coverage could be misinterpreted.





**Fig. S26**

**Summary for *Y. pestis* analysis in Kamenka-2.** (a) The edit distance (less than 10 are shown in the plot), (b) length distribution observed from the reads that are aligned to *Y. pestis* CO92 reference genome in the Kamenka-2, (c) Nucleotide misincorporation patterns.

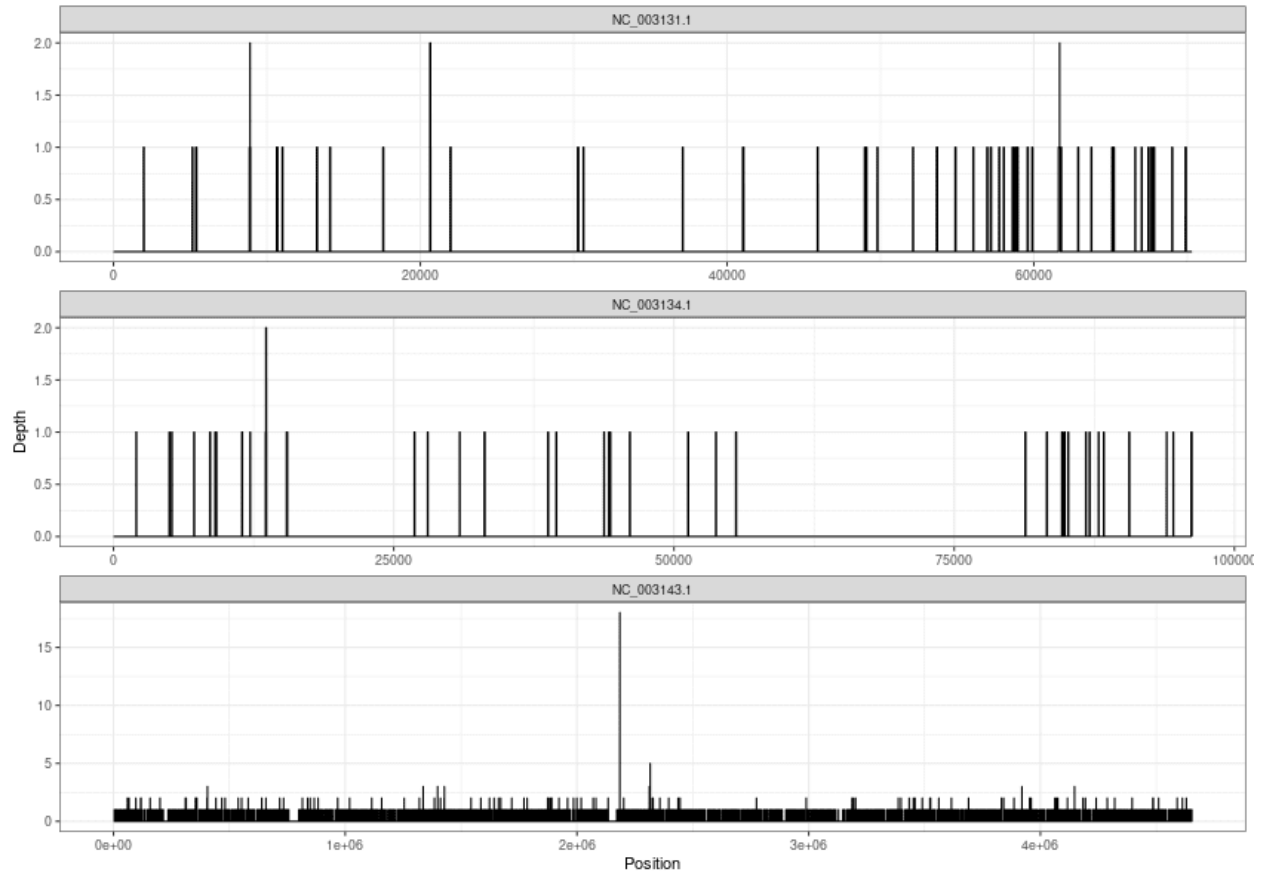

**Fig. S27**

**The coverage distribution among the sequences in *Y. pestis* genome from the Kamenka-2.**

Please note that this plot is to demonstrate the distribution of the coverage among the genomes.

Because of the limited space on the X axis, the coverage could be misinterpreted.

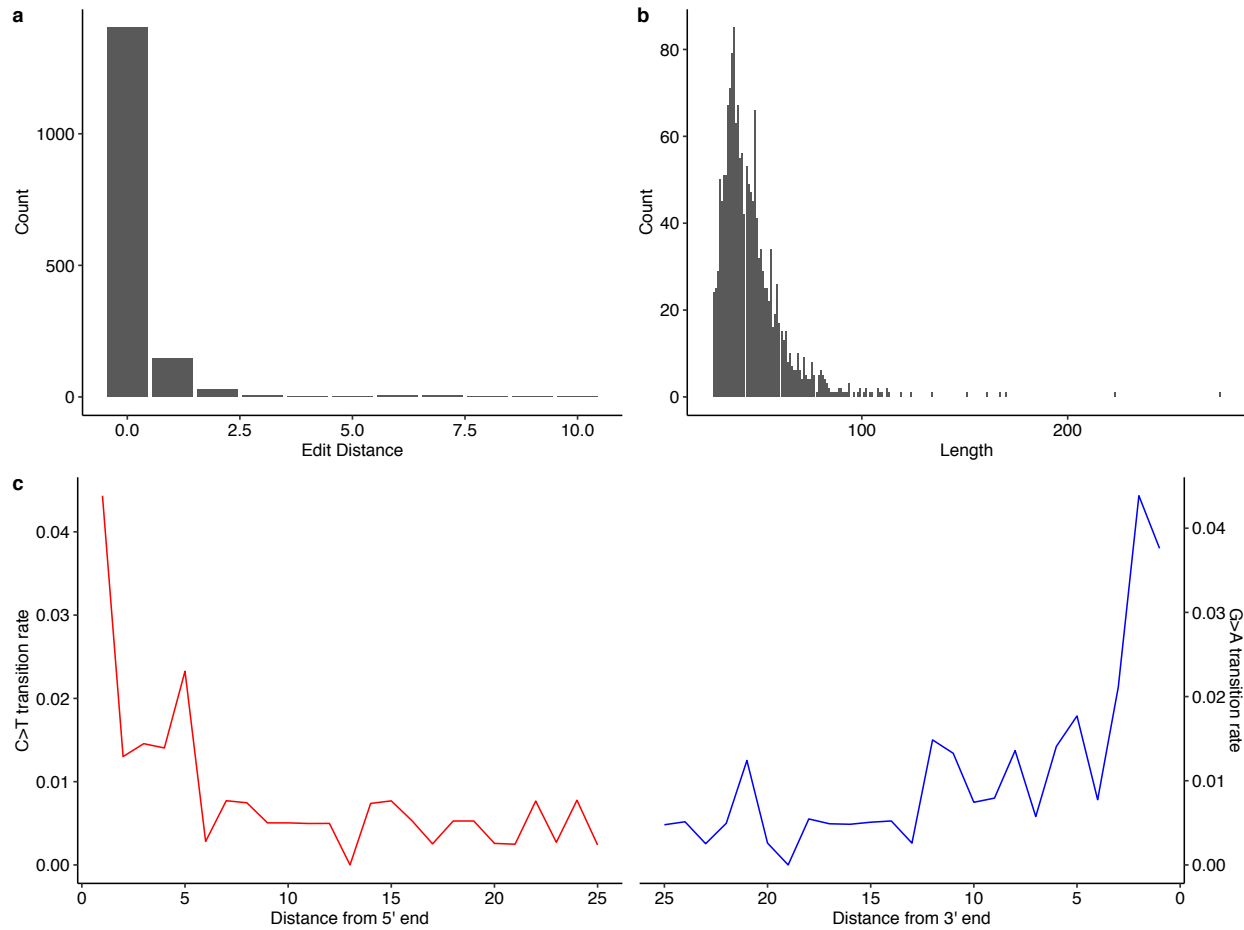

**Fig. S28**

**Summary for *Y. pestis* analysis in Kamenka-1.** (a) The edit distance (less than 10 are shown in the plot), (b) length distribution observed from the reads that are aligned to *Y. pestis* CO92 reference genome in the Kamenka-1, (c) Nucleotide misincorporation patterns.

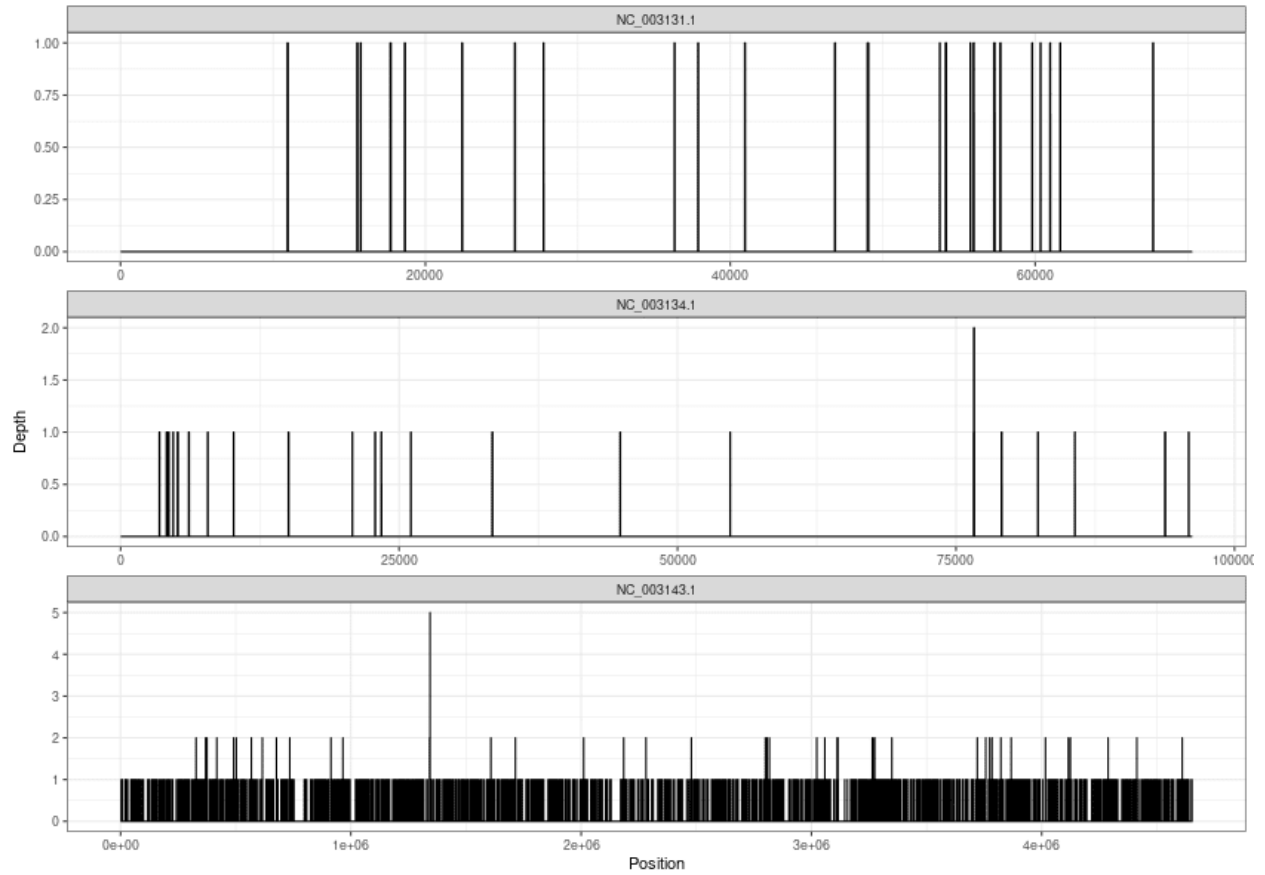

**Fig. S29**

**The coverage distribution among the sequences in *Y. pestis* sequences from Kamenka-1.** Please note that this plot is to demonstrate the distribution of the coverage among the references. Because of the limited space on the X-axis, the coverage could be misinterpreted.

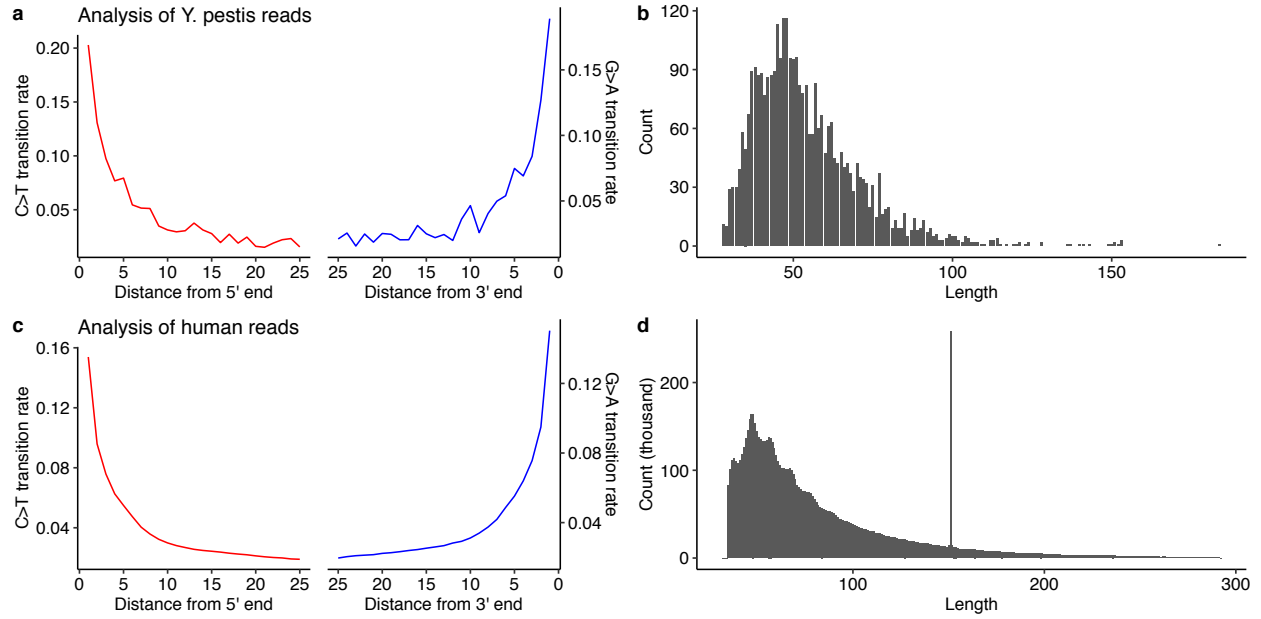

**Fig. S30**

**Comparison of deamination rates and read length distribution between *Y. pestis* and human sequences of Ansanovo-1.** (a) Deamination patterns of *Y. pestis* reads, (b) Read length distribution of *Y. pestis* reads, (c) Deamination patterns of human reads, (d) Read length distribution of human reads.

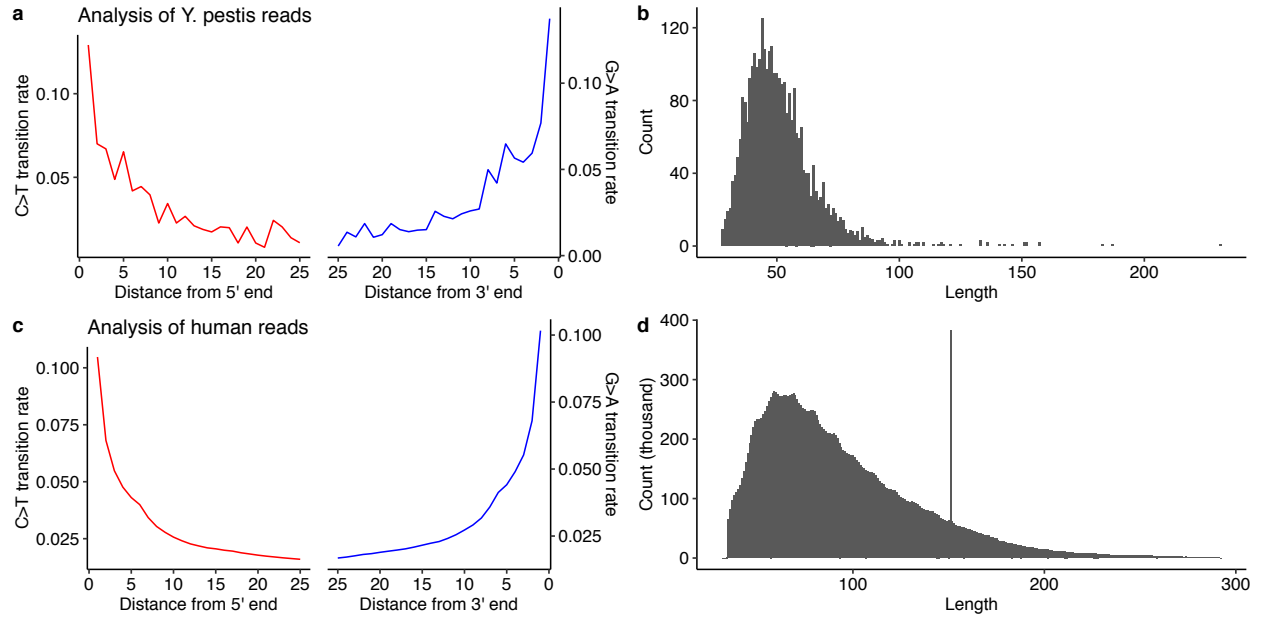

**Fig. S31**

**Comparison of deamination rates and read length distribution between *Y. pestis* and human sequences of Kamenka-2.** (a) Deamination patterns of *Y. pestis* reads, (b) Read length distribution of *Y. pestis* reads, (c) Deamination patterns of human reads, (d) Read length distribution of human reads.

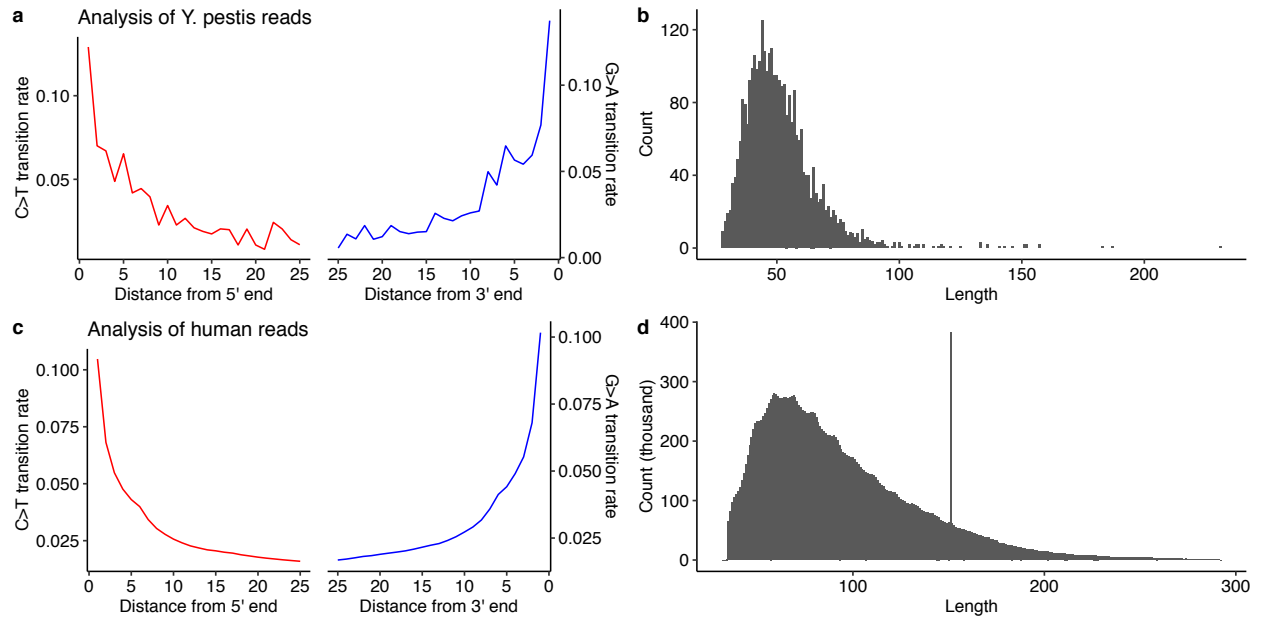

**Fig. S32**

**Comparison of deamination rates and read length distribution between *Y. pestis* and human sequences of Kamenka-1.** (a) Deamination patterns of *Y. pestis* reads, (b) Read length distribution of *Y. pestis* reads, (c) Deamination patterns of human reads, (d) Read length distribution of human reads.

**Table S20.**

**Alignment statistics of the aligned *Y. pestis* reads in different samples.** BF: Before read length and quality filtering, AF: After read length and quality filtering, BD: Before duplication removal, AD: After duplication removal.

| Sample | NO_reads_BF | NO_reads_AF | Mean_length_BD | Mean_coverage_BD | Clonality | NO_reads_AD | Mean_length_AD | Mean_coverage_AD |
|--------|-------------|-------------|----------------|------------------|-----------|-------------|----------------|------------------|
| irk050 | 9523        | 9395        | 54.23          | 0.05             | 64.99     | 3289        | 54.17          | 0.02             |
| yak022 | 2503        | 2480        | 46.57          | 0.01             | 33.87     | 1640        | 46.42          | 0.01             |
| yak023 | 4227        | 4176        | 51.25          | 0.0              | 26.48     | 3070        | 51.37          | 0.02             |

**Table S21.**

**The coverage statistics for the sequences in *Y. pestis* genome in the Anosovo-1.** Coverage describes the percent covered regions at least one time (breadth of coverage more than 1X).

| NCBI_ID     | Length  | Coverage | Name            |
|-------------|---------|----------|-----------------|
| NC_003131.1 | 70305   | 3.41     | plasmid pCD1    |
| NC_003132.1 | 9612    | 0.52     | plasmid pCP1    |
| NC_003134.1 | 96210   | 0.97     | plasmid pMT1    |
| NC_003143.1 | 4653728 | 3.66     | CO92 chromosome |

**Table S22.**

**The coverage statistics for the sequences in *Y. pestis* genome in Kamenka-2.** Coverage describes the percent covered regions at least one time (percent coverage at least 1X).



| NCBI_ID     | Length  | Coverage | Name            |
|-------------|---------|----------|-----------------|
| NC_003131.1 | 70305   | 3.60     | plasmid pCD1    |
| NC_003134.1 | 96210   | 2.13     | plasmid pMT1    |
| NC_003143.1 | 4653728 | 3.16     | CO92 chromosome |

**Table S23.**

**The coverage statistics for the sequences in *Y. pestis* genome in Kamenka-1.** Coverage describes the percent covered regions at least one time (breadth of coverage more than one x).

| -           | Length  | Coverage | Name            |
|-------------|---------|----------|-----------------|
| NC_003131.1 | 70305   | 1.58     | plasmid pCD1    |
| NC_003134.1 | 96210   | 1.02     | plasmid pMT1    |
| NC_003143.1 | 4653728 | 1.56     | CO92 chromosome |

**Table S24.**

**Comparison of single stranded deamination rates of *Y. pestis* and human DNA reads.** Single stranded deamination rates were calculated using mapDamage software.

| Sample | Single strand deamination rate for <i>Y. pestis</i> reads | Single strand deamination rate for human reads |
|--------|-----------------------------------------------------------|------------------------------------------------|
| irk050 | 0.51 +- 0.05                                              | 0.38 +- 0.001                                  |
| yak022 | 0.15 +- 0.06                                              | 0.038 +- 0                                     |
| yak023 | 0.31 +- 0.05                                              | 0.25 +- 0.001                                  |

## REFERENCES AND NOTES

1. J. F. Richards, *The Unending Frontier: An Environmental History of the Early Modern World* (University of California Press, ed. 1, 2003).
2. T. Goebel, M. R. Waters, D. H. O'Rourke, The late Pleistocene dispersal of modern humans in the Americas. *Science* **319**, 1497–1502 (2008).
3. S. J. Fiedel, Y. V. Kuzmin, Radiocarbon date frequency as an index of intensity of Paleolithic occupation of Siberia: Did humans react predictably to climate oscillations? *Radiocarbon*. **49**, 741–756 (2007).
4. V. V. Pitulko, P. A. Nikolsky, E. Y. Giryа, A. E. Basilyan, V. E. Tumskoy, S. A. Koulakov, S. N. Astakhov, E. Y. Pavlova, M. A. Anisimov, The Yana RHS site: Humans in the Arctic before the last glacial maximum. *Science* **303**, 52–56 (2004).
5. M. Sikora, V. V. Pitulko, V. C. Sousa, M. E. Allentoft, L. Vinner, S. Rasmussen, A. Margaryan, P. de Barros Damgaard, C. de la Fuente, G. Renaud, M. A. Yang, Q. Fu, I. Dupanloup, K. Giampoudakis, D. Nogués-Bravo, C. Rahbek, G. Kroonen, M. Peyrot, H. McColl, S. V. Vasilyev, E. Veselovskaya, M. Gerasimova, E. Y. Pavlova, V. G. Chasnyk, P. A. Nikolskiy, A. V. Gromov, V. I. Khartanovich, V. Moiseyev, P. S. Grebenyuk, A. Y. Fedorchenko, A. I. Lebedintsev, S. B. Slobodin, B. A. Malyarchuk, R. Martiniano, M. Meldgaard, L. Arppe, J. U. Palo, T. Sundell, K. Mannermaa, M. Putkonen, V. Alexandersen, C. Primeau, N. Baimukhanov, R. S. Malhi, K.-G. Sjögren, K. Kristiansen, A. Wessman, A. Sajantila, M. M. Lahr, R. Durbin, R. Nielsen, D. J. Meltzer, L. Excoffier, E. Willerslev, The population history of northeastern Siberia since the Pleistocene. *Nature* **570**, 182–188 (2019).
6. A. Henry, E. V. Bezrukova, A. V. Teten'kin, M. I. Kuz'min, New data on vegetation and climate reconstruction in the Baikal-Patom Highland (Eastern Siberia) in the last glacial maximum and early holocene. *Dokl. Earth Sci.* **478**, 241–244 (2018).
7. G. Medvedev, in *The Paleolithic of Siberia: New Discoveries and Interpretations*, A. P. Derevianko, D. B. Shimkin, W. R. Powers, Eds. (Institute of Archaeology and Ethnography, Siberian Division, Russian Academy of Sciences/University of Illinois Press, 1998), pp. 122–132.

8. A. D. Stepanov, A. S. Kirillin, S. A. Vorob'ev, E. N. Solov'eva, N. N. Efimov, in *Ancient cultures of North-Eastern Asia. Astroarchaeology. Paleoinformatics* (Nauka, 2003), pp. 98–113.
9. A. P. Derevianko, Y. V. Kuzmin, G. S. Burr, A. J. T. Jull, J. C. Kim, AMS <sup>14</sup>C age of the earliest pottery from the Russian Far East: 1996–2002 results. *Nucl. Instrum. Methods Phys. Res., Sect. B* **223–224**, 735–739 (2004).
10. Y. V. Kuzmin, L. A. Orlova, The neolithization of Siberia and the Russian Far East: Radiocarbon evidence. *Antiquity* **74**, 356–364 (2000).
11. Y. A. Mochanov, S. A. Fedoseeva, in *American Beginnings. The Prehistory and Palaeoecology of Beringia*, F. H. West, Ed. (The University of Chicago Press, 1996), pp. 215–218.
12. A. N. Alekseyev, V. M. Dyakonov, Radiocarbon chronology of neolithic and bronze age cultures in Yakutia. *Archaeol. Ethnol. Anthropol. Eurasia* **37**, 26–40 (2009).
13. W. R. Powers, R. H. Jordan, Human biogeography and climate change in Siberia and Arctic North America in the fourth and fifth millennia BP. *Philos. Trans. Royal Soc. A* **330**, 665–670 (1990).
14. E. H. M. Wong, A. Khrunin, L. Nichols, D. Pushkarev, D. Khokhrin, D. Verbenko, O. Evgrafov, J. Knowles, J. Novembre, S. Limborska, A. Valouev, Reconstructing genetic history of Siberian and Northeastern European populations. *Genome Res.* **27**, 1–14 (2017).
15. I. Pugach, R. Matveev, V. Spitsyn, S. Makarov, I. Novgorodov, V. Osakovsky, M. Stoneking, B. Pakendorf, The complex admixture history and recent southern origins of Siberian populations. *Mol. Biol. Evol.* **33**, 1777–1795 (2016).
16. P. de Barros Damgaard, R. Martiniano, J. Kamm, J. V. Moreno-Mayar, G. Kroonen, M. Peyrot, G. Barjamovic, S. Rasmussen, C. Zacho, N. Baimukhanov, V. Zaibert, V. Merz, A. Biddanda, I. Merz, V. Loman, V. Evdokimov, E. Usmanova, B. Hemphill, A. Seguin-Orlando, F. E. Yediay, I. Ullah, K.-G. Sjögren, K. H. Iversen, J. Choin, C. de la Fuente, M. Ilardo, H. Schroeder, V. Moiseyev, A. Gromov, A. Polyakov, S. Omura, S. Y. Senyurt, H. Ahmad, C. McKenzie, A. Margaryan, A. Hameed, A. Samad, N. Gul, M. H. Khokhar, O. I. Goriunova, V. I. Bazaliiskii, J. Novembre, A. W. Weber, L. Orlando, M. E. Allentoft, R. Nielsen, K. Kristiansen, M. Sikora, A. K. Outram, R. Durbin,

- E. Willerslev, The first horse herders and the impact of early Bronze Age steppe expansions into Asia. *Science* **360**, eaar7711 (2018).
17. H. Yu, M. A. Spyrou, M. Karapetian, S. Shnaider, R. Radzevičiūtė, K. Nägele, G. U. Neumann, S. Ponske, J. Zech, M. Lucas, P. LeRoux, P. Roberts, G. Pavlenok, A. Buzhilova, C. Posth, C. Jeong, J. Krause, Paleolithic to Bronze Age Siberians reveal connections with first Americans and across Eurasia. *Cell* **181**, 1232–1245.e20 (2020).
18. G. M. Kılınç, N. Kashuba, R. Yaka, A. P. Sümer, E. Yüncü, D. Shergin, G. L. Ivanov, D. Kichigin, K. Pestereva, D. Volkov, P. Mandryka, A. Kharinskii, A. Tishkin, E. Ineshin, E. Kovychev, A. Stepanov, A. Alekseev, S. A. Fedoseeva, M. Somel, M. Jakobsson, M. Krzewińska, J. Storå, A. Götherström, Investigating Holocene human population history in North Asia using ancient mitogenomes. *Sci. Rep.* **8**, 8969 (2018).
19. V. V. Pitulko, P. A. Nikolskiy, The extinction of the woolly mammoth and the archaeological record in Northeastern Asia. *World Archaeol.* **44**, 21–42 (2012).
20. Y. V. Kuzmin, P. A. Kosintsev, A. D. Stepanov, G. G. Boeskorov, R. J. Cruz, Chronology and faunal remains of the Khayrgas cave (Eastern Siberia, Russia). *Radiocarbon* **59**, 575–582 (2017).
21. D. H. Alexander, J. Novembre, K. Lange, Fast model-based estimation of ancestry in unrelated individuals. *Genome Res.* **19**, 1655–1664 (2009).
22. J. K. Pickrell, J. K. Pritchard, Inference of population splits and mixtures from genome-wide allele frequency data. *PLOS Genet.* **8**, e1002967 (2012).
23. M. Raghavan, P. Skoglund, K. E. Graf, M. Metspalu, A. Albrechtsen, I. Moltke, S. Rasmussen, T. W. Stafford Jr., L. Orlando, E. Metspalu, M. Karmin, K. Tambets, S. Rootsi, R. Mägi, P. F. Campos, E. Balanovska, O. Balanovsky, E. Khusnutdinova, S. Litvinov, L. P. Osipova, S. A. Fedorova, M. I. Voevoda, M. DeGiorgio, T. Sicheritz-Ponten, S. Brunak, S. Demeshchenko, T. Kivisild, R. Villems, R. Nielsen, M. Jakobsson, E. Willerslev, Upper Palaeolithic Siberian genome reveals dual ancestry of Native Americans. *Nature* **505**, 87–91 (2014).

24. Q. Fu, C. Posth, M. Hajdinjak, M. Petr, S. Mallick, D. Fernandes, A. Furtwängler, W. Haak, M. Meyer, A. Mittnik, B. Nickel, A. Peltzer, N. Rohland, V. Slon, S. Talamo, I. Lazaridis, M. Lipson, I. Mathieson, S. Schiffels, P. Skoglund, A. P. Derevianko, N. Drozdov, V. Slavinsky, A. Tsybankov, R. G. Cremonesi, F. Mallegni, B. Gély, E. Vacca, M. R. González Morales, L. G. Straus, C. Neugebauer-Maresch, M. Teschler-Nicola, S. Constantin, O. T. Moldovan, S. Benazzi, M. Peresani, D. Coppola, M. Lari, S. Ricci, A. Ronchitelli, F. Valentin, C. Thevenet, K. Wehrberger, D. Grigorescu, H. Rougier, I. Crevecoeur, D. Flas, P. Semal, M. A. Mannino, C. Cupillard, H. Bocherens, N. J. Conard, K. Harvati, V. Moiseyev, D. G. Drucker, J. Svoboda, M. P. Richards, D. Caramelli, R. Pinhasi, J. Kelso, N. Patterson, J. Krause, S. Pääbo, D. Reich, The genetic history of Ice Age Europe. *Nature* **534**, 200–205 (2016).
25. Q. Fu, H. Li, P. Moorjani, F. Jay, S. M. Slepchenko, A. A. Bondarev, P. L. F. Johnson, A. Aximu-Petri, K. Prüfer, C. de Filippo, M. Meyer, N. Zwyns, D. C. Salazar-García, Y. V. Kuzmin, S. G. Keates, P. A. Kosintsev, D. I. Razhev, M. P. Richards, N. V. Peristov, M. Lachmann, K. Douka, T. F. G. Higham, M. Slatkin, J.-J. Hublin, D. Reich, J. Kelso, T. B. Viola, S. Pääbo, Genome sequence of a 45,000-year-old modern human from western Siberia. *Nature* **514**, 445–449 (2014).
26. A. Seguin-Orlando, T. S. Korneliussen, M. Sikora, A.-S. Malaspinas, A. Manica, I. Moltke, A. Albrechtsen, A. Ko, A. Margaryan, V. Moiseyev, T. Goebel, M. Westaway, D. Lambert, V. Khartanovich, J. D. Wall, P. R. Nigst, R. A. Foley, M. M. Lahr, R. Nielsen, L. Orlando, E. Willerslev, Genomic structure in Europeans dating back at least 36,200 years. *Science* **346**, 1113–1118 (2014).
27. M. Sikora, A. Seguin-Orlando, V. C. Sousa, A. Albrechtsen, T. Korneliussen, A. Ko, S. Rasmussen, I. Dupanloup, P. R. Nigst, M. D. Bosch, G. Renaud, M. E. Allentoft, A. Margaryan, S. V. Vasilyev, E. V. Veselovskaya, S. B. Borutskaya, T. Deviese, D. Comeskey, T. Higham, A. Manica, R. Foley, D. J. Meltzer, R. Nielsen, L. Excoffier, M. M. Lahr, L. Orlando, E. Willerslev, Ancient genomes show social and reproductive behavior of early Upper Paleolithic foragers. *Science* **358**, 659–662 (2017).
28. Q. Fu, M. Meyer, X. Gao, U. Stenzel, H. A. Burbano, J. Kelso, S. Pääbo, DNA analysis of an early modern human from Tianyuan cave, China. *Proc. Natl. Acad. Sci. U.S.A.* **110**, 2223–2227 (2013).

29. M. Rasmussen, S. L. Anzick, M. R. Waters, P. Skoglund, M. DeGiorgio, T. W. Stafford Jr., S. Rasmussen, I. Moltke, A. Albrechtsen, S. M. Doyle, G. D. Poznik, V. Gudmundsdottir, R. Yadav, A.-S. Malaspinas, S. S. White V, M. E. Allentoft, O. E. Cornejo, K. Tambets, A. Eriksson, P. D. Heintzman, M. Karmin, T. S. Korneliussen, D. J. Meltzer, T. L. Pierre, J. Stenderup, L. Saag, V. M. Warmuth, M. C. Lopes, R. S. Malhi, S. Brunak, T. Sicheritz-Ponten, I. Barnes, M. Collins, L. Orlando, F. Balloux, A. Manica, R. Gupta, M. Metspalu, C. D. Bustamante, M. Jakobsson, R. Nielsen, E. Willerslev, The genome of a late Pleistocene human from a Clovis burial site in western Montana. *Nature* **506**, 225–229 (2014).
30. M. Rasmussen, Y. Li, S. Lindgreen, J. S. Pedersen, A. Albrechtsen, I. Moltke, M. Metspalu, E. Metspalu, T. Kivisild, R. Gupta, M. Bertalan, K. Nielsen, M. T. P. Gilbert, Y. Wang, M. Raghavan, P. F. Campos, H. M. Kamp, A. S. Wilson, A. Gledhill, S. Tridico, M. Bunce, E. D. Lorenzen, J. Binladen, X. Guo, J. Zhao, X. Zhang, H. Zhang, Z. Li, M. Chen, L. Orlando, K. Kristiansen, M. Bak, N. Tommerup, C. Bendixen, T. L. Pierre, B. Grønnow, M. Meldgaard, C. Andreasen, S. A. Fedorova, L. P. Osipova, T. F. G. Higham, C. B. Ramsey, T. V. O. Hansen, F. C. Nielsen, M. H. Crawford, S. Brunak, T. Sicheritz-Pontén, R. Villems, R. Nielsen, A. Krogh, J. Wang, E. Willerslev, Ancient human genome sequence of an extinct Palaeo-Eskimo. *Nature* **463**, 757–762 (2010).
31. Y. V. Kuzmin, L. A. Orlova, Radiocarbon chronology of the Siberian Paleolithic. *J. World Prehist.* **12**, 1–53 (1998).
32. T. M. Friesen, On the naming of Arctic Archaeological Traditions: The case for Paleo-Inuit. *ARCTIC* **68**, iii–iv (2015).
33. P. Flegontov, N. E. Altınışık, P. Changmai, N. Rohland, S. Mallick, N. Adamski, D. A. Bolnick, N. Broomandkhoshbacht, F. Candilio, B. J. Culleton, O. Flegontova, T. M. Friesen, C. Jeong, T. K. Harper, D. Keating, D. J. Kennett, A. M. Kim, T. C. Lamnidis, A. M. Lawson, I. Olalde, J. Oppenheimer, B. A. Potter, J. Raff, R. A. Sattler, P. Skoglund, K. Stewardson, E. J. Vajda, S. Vasilyev, E. Veselovskaya, M. G. Hayes, D. H. O’Rourke, J. Krause, R. Pinhasi, D. Reich, S. Schiffels, Palaeo-Eskimo genetic ancestry and the peopling of Chukotka and North America. *Nature* **570**, 236–240 (2019).

34. W. Haak, I. Lazaridis, N. Patterson, N. Rohland, S. Mallick, B. Llamas, G. Brandt, S. Nordenfelt, E. Harney, K. Stewardson, Q. Fu, A. Mittnik, E. Bánffy, C. Economou, M. Francken, S. Friederich, R. G. Pena, F. Hallgren, V. Khartanovich, A. Khokhlov, M. Kunst, P. Kuznetsov, H. Meller, O. Mochalov, V. Moiseyev, N. Nicklisch, S. L. Pichler, R. Risch, M. A. Rojo Guerra, C. Roth, A. Szécsényi-Nagy, J. Wahl, M. Meyer, J. Krause, D. Brown, D. Anthony, A. Cooper, K. W. Alt, D. Reich, Massive migration from the steppe was a source for Indo-European languages in Europe. *Nature* **522**, 207–211 (2015).
35. V. M. Vetrov, E. M. Ineshin, The most ancient ceramics of Baikal Siberia in the context of the traditions of ceramics of east Asia. *Vestnik Sankt-Peterburgskogo Universiteta, Istoriya* **64**, 453–473 (2019).
36. V. Siska, E. R. Jones, S. Jeon, Y. Bhak, H.-M. Kim, Y. S. Cho, H. Kim, K. Lee, E. Veselovskaya, T. Balueva, M. Gallego-Llorente, M. Hofreiter, D. G. Bradley, A. Eriksson, R. Pinhasi, J. Bhak, A. Manica, Genome-wide data from two early Neolithic East Asian individuals dating to 7700 years ago. *Sci. Adv.* **3**, e1601877 (2017).
37. I. Lazaridis, N. Patterson, A. Mittnik, G. Renaud, S. Mallick, K. Kirsanow, P. H. Sudmant, J. G. Schraiber, S. Castellano, M. Lipson, B. Berger, C. Economou, R. Bollongino, Q. Fu, K. I. Bos, S. Nordenfelt, H. Li, C. de Filippo, K. Prüfer, S. Sawyer, C. Posth, W. Haak, F. Hallgren, E. Fornander, N. Rohland, D. Delsate, M. Francken, J.-M. Guinet, J. Wahl, G. Ayodo, H. A. Babiker, G. Bailliet, E. Balanovska, O. Balanovsky, R. Barrantes, G. Bedoya, H. Ben-Ami, J. Bene, F. Berrada, C. M. Bravi, F. Brisighelli, G. B. J. Busby, F. Cali, M. Churnosov, D. E. C. Cole, D. Corach, L. Damba, G. van Driem, S. Dryomov, J.-M. Dugoujon, S. A. Fedorova, I. G. Romero, M. Gubina, M. Hammer, B. M. Henn, T. Hervig, U. Hodoglugil, A. R. Jha, S. Karachanak-Yankova, R. Khusainova, E. Khusnutdinova, R. Kittles, T. Kivisild, W. Klitz, V. Kučinskas, A. Kushniarevich, L. Laredj, S. Litvinov, T. Loukidis, R. W. Mahley, B. Melegh, E. Metspalu, J. Molina, J. Mountain, K. Näkkäläjärvi, D. Nesheva, T. Nyambo, L. Osipova, J. Parik, F. Platonov, O. Posukh, V. Romano, F. Rothhammer, I. Rudan, R. Ruizbakiev, H. Sahakyan, A. Sajantila, A. Salas, E. B. Starikovskaya, A. Tarekegn, D. Toncheva, S. Turdikulova, I. Uktveryte, O. Utevska, R. Vasquez, M. Villena, M. Voevoda, C. A. Winkler, L. Yepiskoposyan, P. Zalloua, T. Zemunik, A. Cooper, C. Capelli, M. G. Thomas, A. Ruiz-Linares, S. A. Tishkoff, L. Singh, K. Thangaraj, R. Villems, D. Comas, R.

- Sukernik, M. Metspalu, M. Meyer, E. E. Eichler, J. Burger, M. Slatkin, S. Pääbo, J. Kelso, D. Reich, J. Krause, Ancient human genomes suggest three ancestral populations for present-day Europeans. *Nature* **513**, 409–413 (2014).
38. P. Ya. Groisman, T. A. Blyakharchuk, A. V. Chernokulsky, M. M. Arzhanov, L. B. Marchesini, E. G. Bogdanova, I. I. Borzenkova, O. N. Bulygina, A. A. Karpenko, L. V. Karpenko, R. W. Knight, V. Ch. Khon, G. N. Korovin, A. V. Meshcherskaya, I. I. Mokhov, E. I. Parfenova, V. N. Razuvaev, N. A. Speranskaya, N. M. Tchebakova, N. N. Vygodskaya, in *Regional Environmental Changes in Siberia and Their Global Consequences*, P. Ya. Groisman, G. Gutman, Eds. (Springer Netherlands, 2013), pp. 57–109.
39. S. Rasmussen, M. E. Allentoft, K. Nielsen, L. Orlando, M. Sikora, K.-G. Sjögren, A. G. Pedersen, M. Schubert, A. Van Dam, C. M. O. Kapel, H. B. Nielsen, S. Brunak, P. Avetisyan, A. Epimakhov, M. V. Khalyapin, A. Gnuni, A. Kriiska, I. Lasak, M. Metspalu, V. Moiseyev, A. Gromov, D. Pokutta, L. Saag, L. Varul, L. Yepiskoposyan, T. Sicheritz-Pontén, R. A. Foley, M. M. Lahr, R. Nielsen, K. Kristiansen, E. Willerslev, Early divergent strains of *Yersinia pestis* in Eurasia 5,000 years ago. *Cell* **163**, 571–582 (2015).
40. D. Y. Yang, B. Eng, J. S. Wayne, J. C. Dудар, S. R. Saunders, Improved DNA extraction from ancient bones using silica-based spin columns. *Am. J. Phys. Anthropol.* **105**, 539–543 (1998).
41. H. Malmström, E. M. Svensson, M. T. P. Gilbert, E. Willerslev, A. Götherström, G. Holmlund, More on contamination: The use of asymmetric molecular behavior to identify authentic ancient human DNA. *Mol. Biol. Evol.* **24**, 998–1004 (2007).
42. T. Günther, C. Valdiosera, H. Malmström, I. Ureña, R. Rodríguez-Varela, Ó. O. Sverrisdóttir, E. A. Daskalaki, P. Skoglund, T. Naidoo, E. M. Svensson, J. M. Bermúdez de Castro, E. Carbonell, M. Dunn, J. Storå, E. Iriarte, J. L. Arsuaga, J.-M. Carretero, A. Götherström, M. Jakobsson, Ancient genomes link early farmers from Atapuerca in Spain to modern-day Basques. *Proc. Natl. Acad. Sci. U.S.A.* **112**, 11917–11922 (2015).



43. A. W. Briggs, P. Heyn, Preparation of Next-Generation Sequencing Libraries from Damaged DNA, in *Ancient DNA: Methods and Protocols*, B. Shapiro, M. Hofreiter, Eds. (Humana Press, 2012), pp. 143–154.
44. M. Kircher, in *Methods in Molecular Biology (Clifton, N.J.)* (Humana Press Inc., 2012), vol. 840, pp. 197–228.
45. H. Li, R. Durbin, Fast and accurate short read alignment with Burrows-Wheeler transform. *Bioinformatics* **25**, 1754–1760 (2009).
46. H. Li, B. Handsaker, A. Wysoker, T. Fennell, J. Ruan, N. Homer, G. Marth, G. Abecasis, R. Durbin, The Sequence Alignment/Map format and SAMtools. *Bioinformatics* **25**, 2078–2079 (2009).
47. R. E. Green, A.-S. Malaspina, J. Krause, A. W. Briggs, P. L. F. Johnson, C. Uhler, M. Meyer, J. M. Good, T. Maricic, U. Stenzel, K. Prüfer, M. Siebauer, H. A. Burbano, M. Ronan, J. M. Rothberg, M. Egholm, P. Rudan, D. Brajković, Ž. Kučan, I. Gušić, M. Wikström, L. Laakkonen, J. Kelso, M. Slatkin, S. Pääbo, A complete neandertal mitochondrial genome sequence determined by high-throughput sequencing. *Cell* **134**, 416–426 (2008).
48. Q. Fu, A. Mittnik, P. L. F. Johnson, K. Bos, M. Lari, R. Bollongino, C. Sun, L. Giemsch, R. Schmitz, J. Burger, A. M. Ronchitelli, F. Martini, R. G. Cremonesi, J. Svoboda, P. Bauer, D. Caramelli, S. Castellano, D. Reich, S. Pääbo, J. Krause, A revised timescale for human evolution based on ancient mitochondrial genomes. *Curr. Biol.* **23**, 553–559 (2013).
49. T. S. Korneliussen, A. Albrechtsen, R. Nielsen, ANGSD: Analysis of next generation sequencing data. *BMC Bioinformatics.* **15**, 356 (2014).
50. P. Skoglund, J. Storå, A. Götherström, M. Jakobsson, Accurate sex identification of ancient human remains using DNA shotgun sequencing. *J. Archaeol. Sci.* **40**, 4477–4482 (2013).
51. M. Lipatov, K. Sanjeev, R. Patro, K. R. Veeramah, Maximum likelihood estimation of biological relatedness from low coverage sequencing data. *bioRxiv* 023374 (2015).

52. L. Pagani, D. J. Lawson, E. Jagoda, A. Mörseburg, A. Eriksson, M. Mitt, F. Clemente, G. Hudjashov, M. DeGiorgio, L. Saag, J. D. Wall, A. Cardona, R. Mägi, M. A. W. Sayres, S. Kaewert, C. Inchley, C. L. Scheib, M. Järve, M. Karmin, G. S. Jacobs, T. Antao, F. M. Iliescu, A. Kushniarevich, Q. Ayub, C. Tyler-Smith, Y. Xue, B. Yunusbayev, K. Tambets, C. B. Mallick, L. Saag, E. Pocheshkhova, G. Andriadze, C. Muller, M. C. Westaway, D. M. Lambert, G. Zoraqi, S. Turdikulova, D. Dalimova, Z. Sabitov, G. N. N. Sultana, J. Lachance, S. Tishkoff, K. Momynaliev, J. Isakova, L. D. Damba, M. Gubina, P. Nymadawa, I. Evseeva, L. Atramentova, O. Utevska, F.-X. Ricaut, N. Brucato, H. Sudoyo, T. Letellier, M. P. Cox, N. A. Barashkov, V. Skaro, L. Mulahasanovic, D. Primorac, H. Sahakyan, M. Mormina, C. A. Eichstaedt, D. V. Lichman, S. Abdullah, G. Chaubey, J. T. S. Wee, E. Mihailov, A. Karunas, S. Litvinov, R. Khusainova, N. Ekomasova, V. Akhmetova, I. Khidiyatova, D. Marjanović, L. Yepiskoposyan, D. M. Behar, E. Balanovska, A. Metspalu, M. Derenko, B. Malyarchuk, M. Voevoda, S. A. Fedorova, L. P. Osipova, M. M. Lahr, P. Gerbault, M. Leavesley, A. B. Migliano, M. Petraglia, O. Balanovsky, E. K. Khusnutdinova, E. Metspalu, M. G. Thomas, A. Manica, R. Nielsen, R. Villems, E. Willerslev, T. Kivisild, M. Metspalu, Genomic analyses inform on migration events during the peopling of Eurasia. *Nature* **538**, 238–242 (2016).
53. B. S. Weir, A. D. Anderson, A. B. Hepler, Genetic relatedness analysis: Modern data and new challenges. *Nat. Rev. Genet.* **7**, 771–780 (2006).
54. M. van Oven, PhyloTree Build 17: Growing the human mitochondrial DNA tree. *Forensic. Sci. Int. Genet. Suppl. Ser.* **5**, e392–e394 (2015).
55. D. Vianello, F. Sevini, G. Castellani, L. Lomartire, M. Capri, C. Franceschi, HAPLOFIND: A new method for high-throughput mtDNA haplogroup assignment. *Hum. Mutat.* **34**, 1189–1194 (2013).
56. A. Kloss-Brandstätter, D. Pacher, S. Schönherr, H. Weissensteiner, R. Binna, G. Specht, F. Kronenberg, HaploGrep: A fast and reliable algorithm for automatic classification of mitochondrial DNA haplogroups. *Hum. Mutat.* **32**, 25–32 (2011).
57. N. Patterson, P. Moorjani, Y. Luo, S. Mallick, N. Rohland, Y. Zhan, T. Genschoreck, T. Webster, D. Reich, Ancient admixture in human history. *Genetics* **192**, 1065–1093 (2012).

58. 1000 Genomes Project Consortium, A. Auton, L. D. Brooks, R. M. Durbin, E. P. Garrison, H. M. Kang, J. O. Korbelt, J. L. Marchini, S. McCarthy, G. A. McVean, G. R. Abecasis, A global reference for human genetic variation. *Nature* **526**, 68–74 (2015).
59. G. Jun, M. K. Wing, G. R. Abecasis, H. M. Kang, An efficient and scalable analysis framework for variant extraction and refinement from population-scale DNA sequence data. *Genome Res.* **25**, 918–925 (2015).
60. M. A. DePristo, E. Banks, R. Poplin, K. V. Garimella, J. R. Maguire, C. Hartl, A. A. Philippakis, G. del Angel, M. A. Rivas, M. Hanna, A. McKenna, T. J. Fennell, A. M. Kernytsky, A. Y. Sivachenko, K. Cibulskis, S. B. Gabriel, D. Altshuler, M. J. Daly, A framework for variation discovery and genotyping using next-generation DNA sequencing data. *Nat. Genet.* **43**, 491–498 (2011).
61. N. Patterson, A. L. Price, D. Reich, Population structure and eigenanalysis. *PLOS Genet.* **2**, e190 (2006).
62. S. Purcell, B. Neale, K. Todd-Brown, L. Thomas, M. A. R. Ferreira, D. Bender, J. Maller, P. Sklar, P. I. W. de Bakker, M. J. Daly, P. C. Sham, PLINK: A tool set for whole-genome association and population-based linkage analyses. *Am. J. Hum. Genet.* **81**, 559–575 (2007).
63. M. Sikora, M. L. Carpenter, A. Moreno-Estrada, B. M. Henn, P. A. Underhill, F. Sánchez-Quinto, I. Zara, M. Pitzalis, C. Sidore, F. Busonero, A. Maschio, A. Angius, C. Jones, J. Mendoza-Revilla, G. Nekhrizov, D. Dimitrova, N. Theodossiev, T. T. Harkins, A. Keller, F. Maixner, A. Zink, G. Abecasis, S. Sanna, F. Cucca, C. D. Bustamante, Population genomic analysis of ancient and modern genomes yields new insights into the genetic ancestry of the Tyrolean Iceman and the genetic structure of Europe. *PLOS Genet.* **10**, e1004353 (2014).
64. M. Jakobsson, N. A. Rosenberg, CLUMPP: A cluster matching and permutation program for dealing with label switching and multimodality in analysis of population structure. *Bioinformatics* **23**, 1801–1806 (2007).
65. M. G. Llorente, E. R. Jones, A. Eriksson, V. Siska, K. W. Arthur, J. W. Arthur, M. C. Curtis, J. T. Stock, M. Coltorti, P. Pieruccini, S. Stretton, F. Brock, T. Higham, Y. Park, M. Hofreiter, D. G.

- Bradley, J. Bhak, R. Pinhasi, A. Manica, Ancient Ethiopian genome reveals extensive Eurasian admixture in Eastern Africa. *Science* **350**, 820–822 (2015).
66. P. Danecek, A. Auton, G. Abecasis, C. A. Albers, E. Banks, M. A. DePristo, R. E. Handsaker, G. Lunter, G. T. Marth, S. T. Sherry, G. McVean, R. Durbin; 1000 Genomes Project Analysis Group, The variant call format and VCFtools. *Bioinformatics* **27**, 2156–2158 (2011).
67. N. A. O’Leary, M. W. Wright, J. R. Brister, S. Ciufu, D. Haddad, R. McVeigh, B. Rajput, B. Robbertse, B. Smith-White, D. Ako-Adjei, A. Astashyn, A. Badretdin, Y. Bao, O. Blinkova, V. Brover, V. Chetvernin, J. Choi, E. Cox, O. Ermolaeva, C. M. Farrell, T. Goldfarb, T. Gupta, D. Haft, E. Hatcher, W. Hlavina, V. S. Joardar, V. K. Kodali, W. Li, D. Maglott, P. Masterson, K. M. McGarvey, M. R. Murphy, K. O’Neill, S. Pujar, S. H. Rangwala, D. Rausch, L. D. Riddick, C. Schoch, A. Shkeda, S. S. Storz, H. Sun, F. Thibaud-Nissen, I. Tolstoy, R. E. Tully, A. R. Vatsan, C. Wallin, D. Webb, W. Wu, M. J. Landrum, A. Kimchi, T. Tatusova, M. DiCuccio, P. Kitts, T. D. Murphy, K. D. Pruitt, Reference sequence (RefSeq) database at NCBI: Current status, taxonomic expansion, and functional annotation. *Nucleic Acids Res.* **44**, D733–D745 (2016).
68. R. Hübler, F. M. Key, C. Warinner, K. I. Bos, J. Krause, A. Herbig, HOPS: Automated detection and authentication of pathogen DNA in archaeological remains. *Genome Biol.* **20**, 280 (2019).
69. H. Jónsson, A. Ginolhac, M. Schubert, P. L. F. Johnson, L. Orlando, mapDamage2.0: Fast approximate Bayesian estimates of ancient DNA damage parameters. *Bioinformatics* **29**, 1682–1684 (2013).
70. V. D. Mats, T. I. Perepelova, A new perspective on evolution of the Baikal Rift. *Geosci. Front.* **2**, 349–365 (2011).
71. R. S. Losey, M. A. Katzenberg, T. Nomokonova, Middle holocene fishing and hunting in the Baikal Region of Siberia, in *The Oxford Handbook of the Archaeology of Diet*, J. Lee-Thorp, M. A. Katzenberg, Eds. (Oxford Univ. Press, 2015).
72. N. Berdnikova, Archaeological «Breaks»: Interpretive possibilities (Baikalian Siberia). *Archaeol. Ethnol. Anthropol.* **1**, 178–202 (2012).

73. M. V. Konstantinov, in *Archaeological Quest (North Asia)*, V. E. Medvedev, Ed. (Nauka, 1980), pp. 16–24.
74. V. I. Bazaliiskii, Burial complexes of the epoch of late mesolithic-neolithic of Baikal Siberia: Burial rites, absolute age. *Reports of the Laboratory of Ancient Technologies. Irkutsk National Research Technical University* **9**, 43–101 (2012).
75. M. V. Konstantinov, A. V. Konstantinov, Historical heritage of archaeological discoveries and epochs. *Small Enciclopedia of Transbaikalia: Archaeology. Part 1*, 12–40 (2011).
76. R. J. Losey, A. L. Waters-Rist, T. Nomokonova, A. A. Kharinskii, A second mortuary hiatus on Lake Baikal in Siberia and arrival of small-scale pastoralism. *Sci. Rep.* **7**, 2319 (2017).
77. Y. A. Mochanov, R. L. Bland, The most ancient paleolithic of the diring and the problem of a nontropical origin for humanity. *Arctic Anthropol.* **30**, 22–53 (1993).
78. G. V. Turkin, A. V. Kharinskii, The Shamanka II cemetery: To the question of cultural affinity of the Neolithic-Bronze Age burial complexes in southern Baikal. *The Bulletin of Irkutsk State University* 124–158 (2004).
79. A. W. Weber, D. White, V. I. Bazaliiskii, O. I. Goriunova, N. A. Savel'ev, M. A. Katzenberg, Hunter–gatherer foraging ranges, migrations, and travel in the middle Holocene Baikal region of Siberia: Insights from carbon and nitrogen stable isotope signatures. *J. Anthropol. Archaeol.* **30**, 523–548 (2011).
80. A. W. Weber, D. W. Link and M. A. Katzenberg, Hunter-gatherer culture change and continuity in the Middle Holocene of the Cis-Baikal, Siberia, *J. Anthropol. Archaeol.* **21**, 230–299 (2002).
81. A. P. Okladnikov, *Neolithic and Bronze Ages of Cis-Baikal. Part I & II* (Academy of Sciences USSR, 1950).
82. A. P. Okladnikov, in *Ancient Population of Siberia and Its Cultures*, M. Levin, L. Potapov, Eds. (University of Chicago Press, 1964), pp. 13–98.

83. V. I. Bazaliiskii, E. V. Menshagin, V. V. Golbert, V. N. Prokopijev, in *Problems of Archaeology and Ethnography of Siberia* (Irkutsk State University, 1982), pp. 68–69.
84. P. P. Khoroshikh, in *Siberian Archaeological Miscellany*, A. P. Okladnikov, Ed. (Nauka, 1966), pp. 84–93.
85. M. P. Ovchinnikov, Materials for the study of the ancient objects in the surroundings of Irkutsk. *Proceedings of the Imperial Russian Geographical Society XXXV*, 62–76 (1904).
86. M. P. Aksenov, Survey at Lena river. *Archaeological Discoveries of 1972. Nauka* 196–197 (1973).
87. D. L. Shergin, in *Ancient cultures of Mongolia and Baikal Siberia: Material from International Scientific Conference* (Buryat State University, 2010), pp. 56–60.
88. V. M. Vetrov, N. E. Berdnikova, A. I. Zhuravljov, A. V. Frolov, in *Paleoethnology of Siberia* (Irkutsk, 1990), pp. 137–139.
89. D. E. Kichigin, Y. A. Emel'janova, A. M. Korostelev, in *Ancient Cultures of Mongolia, Baikal Siberia and Northern China* (2017).
90. A. G. Novikov, O. I. Gorjunova, in *Ancient Cultures of Mongolia and Baikal Siberia. Part 2* (Tuvan State University, 2014), pp. 81–85.
91. N. S. Sosnovkaja, A. V. Kharniskii, in *Dulovskij Readings 1997, Section of Archaeology and Ethnography: Materials of Seminar and Announcement* (Irkutsk, 1997), pp. 70–73.
92. A. P. Okladnikov, I. I. Kirillov, *South-East Transbaikalia in the Stone Age and Early Bronze Age* (Nauka, 1980).
93. V. I. Bazaliiskii, V. A. Savelyev, The Wolf of Baikal: The “Lokomotiv” early Neolithic cemetery in Siberia (Russia). *Antiquity*. **77**, 20–30 (2003).
94. A. V. Kharinskii, E. V. Kovychev, N. N. Kradin, S. G. Bocharov, A. G. Sitdikov, in *Dialogue of Urban and Steppe Cultures in the Eurasian Range. Historical Geography of Golden Horde:*

*Materials of the Seventh International Conference, Dedicated to the Memory of Fjodorov-Davydov G.A.* (Stratum Plus, 2016), pp. 65–68.

95. N. G. Dyatchina, The description of bone and horn articles found at Priargun Sites of Late Neolithic-Bronze Age. *Gumanitarnyj vektor* **30**, 47–59 (2012).
96. Y. A. Mochanov, S. A. Fedoseeva, *Sketches of Prehistory of Yakutia. Stone Age: In 2 Parts. Part 2—Yakutsk* (2013), pp. 489–489.
97. A. N. Alekseyev, E. K. Zhirkov, A. D. Stepanov, A. K. Sharaborin, L. L. Alekseeva, Burial of an Ymyiakhtakh Warrior in Kyordyughen, Yakutia. *Archaeol. Ethnol. Anthropol. Eurasia* **26**, 45–52 (2006).
98. A. D. Stepanov, Y. V. Kuzmin, G. W. L. Hodgins, A. J. T. Jall, Kyordyugen site, Ymyiakhtakh culture, Yakutia: An interpretation of burial rite. *Archaeol. Ethnol. Anthropol. Eurasia* **N40**, 51–61 (2012).
99. T. A. Chikisheva, A. V. Zubova, N. N. Rahimova, P. V. Volkov, D. V. Pozdnyakov, Anthropological research of the Neolithic burial on the monument of Pomazkino III (Middle Kolyma river). *Theory and Practice of Archaeological Investigations* **20**, 112–137 (2017).
100. V. A. Kashin, Neolithic burial of children at Middle Kolyma river. *Archaeol. Ethnol. Anthropol. Eurasia* **2**, 78–81 (2001).
101. E. G. Shpakova, Anthropological characteristics of the burial of a child from Late Neolithic Age from the site of Kamenka II. *Archaeol. Ethnol. Anthropol. Eurasia* **2**, 140–153 (2001).
102. A. D. Stepanov, Early Iron Age Dyupsya burial, Central Yakutia. *Archaeol. Ethnol. Anthropol. Eurasia* **38**, 32–32 (2010).
103. A. D. Stepanov, Y. V. Kuzmin, E. J. T. Jall, New data on the chronology of the Early Iron Age of Yakutia. *The Bulletin of Irkutsk State University. Series “Geoarchaeology. Ethnology. Anthropology”* 106–112 (2014).

104. N. P. Sentekjaeva, in *Archeology* (Novosibirsk State University, 2015), pp. 11–17.
105. N. Kashuba, thesis, Uppsala University, Disciplinary Domain of Humanities and Social Sciences, Faculty of Arts, Department of Archaeology and Ancient History, Archaeology (2017).
106. C. Bronk Ramsey, Bayesian analysis of radiocarbon dates. *Radiocarbon* **51**, 337–360 (2009).
107. P. J. Reimer, E. Bard, A. Bayliss, J. W. Beck, P. G. Blackwell, C. Bronk Ramsey, C. E. Buck, H. Cheng, R. L. Edwards, M. Friedrich, P. M. Grootes, T. P. Guilderson, H. Haflidason, I. Hajdas, C. Hatté, T. J. Heaton, D. L. Hoffmann, A. G. Hogg, K. A. Hughen, K. F. Kaiser, B. Kromer, S. W. Manning, M. Niu, R. W. Reimer, D. A. Richards, E. M. Scott, J. R. Southon, R. A. Staff, C. S. M. Turney, J. van der Plicht, IntCal13 and Marine13 radiocarbon age calibration curves 0–50,000 years cal BP. *Radiocarbon* **55**, 1869–1887 (2013).
108. P. S. G. Chain, E. Carniel, F. W. Larimer, J. Lamerdin, P. O. Stoutland, W. M. Regala, A. M. Georgescu, L. M. Vergez, M. L. Land, V. L. Motin, R. R. Brubaker, J. Fowler, J. Hinnebusch, M. Marceau, C. Medigue, M. Simonet, V. Chenal-Francisque, B. Souza, D. Dacheux, J. M. Elliott, A. Derbise, L. J. Hauser, E. Garcia, Insights into the evolution of *Yersinia pestis* through whole-genome comparison with *Yersinia pseudotuberculosis*. *Proc. Natl. Acad. Sci. U.S.A.* **101**, 13826–13831 (2004).
109. F. M. Key, C. Posth, J. Krause, A. Herbig, K. I. Bos, Mining metagenomic data sets for ancient DNA: Recommended protocols for authentication. *Trends Genet.* **33**, 508–520 (2017).
110. M. A. Jobling, *Human Evolutionary Genetics* (Garland Science, ed. 2, 2014).
111. D. W. Hein, Molecular genetics and function of NAT1 and NAT2: Role in aromatic amine metabolism and carcinogenesis. *Mutat. Res.* **506–507**, 65–77 (2002).
112. A. Sabbagh, P. Darlu, B. Crouau-Roy, E. S. Poloni, Arylamine *N*-acetyltransferase 2 (*NAT2*) genetic diversity and traditional subsistence: A worldwide population survey. *PLOS ONE* **6**, e18507 (2011).



113. E. Patin, L. B. Barreiro, P. C. Sabeti, F. Austerlitz, F. Luca, A. Sajantila, D. M. Behar, O. Semino, A. Sakuntabhai, N. Guiso, B. Gicquel, K. McElreavey, R. M. Harding, E. Heyer, L. Quintana-Murci, Deciphering the ancient and complex evolutionary history of human arylamine N-acetyltransferase genes. *Am. J. Hum. Genet.* **78**, 423–436 (2006).
114. Y. Peng, H. Shi, X.-b. Qi, C.-j. Xiao, H. Zhong, R.-l. Z. Ma, B. Su, The ADH1B Arg47His polymorphism in East Asian populations and expansion of rice domestication in history. *BMC Evol. Biol.* **10**, 15 (2010).
115. H. Magalon, E. Patin, F. Austerlitz, T. Hegay, A. Aldashev, L. Quintana-Murci, E. Heyer, Population genetic diversity of the *NAT2* gene supports a role of acetylation in human adaptation to farming in Central Asia. *Eur. J. Hum. Genet.* **16**, 243–251 (2008).
116. I. B. Kuznetsov, M. McDuffie, R. Moslehi, A web server for inferring the human *N*-acetyltransferase-2 (*NAT2*) enzymatic phenotype from *NAT2* genotype. *Bioinformatics* **25**, 1185–1186 (2009).
117. Y. J. He, M. H. Shapero, H. L. Mcleod, Novel tagging SNP rs1495741 and 2-SNPs (rs1041983 and rs1801280) yield a high prediction of the *NAT2* genotype in HapMap samples. *Pharmacogenet. Genomics* **22**, 322–324 (2012).
118. S. Selinski, M. Blaszkewicz, M.-L. Lehmann, D. Ovsiannikov, O. Moormann, C. Guballa, A. Kress, M. C. Truss, H. Gerullis, T. Otto, D. Barski, G. Niegisch, P. Albers, S. Frees, W. Brenner, J. W. Thüroff, M. Angeli-Greaves, T. Seidel, G. Roth, H. Dietrich, R. Ebbinghaus, H. M. Prager, H. M. Bolt, M. Falkenstein, A. Zimmermann, T. Klein, T. Reckwitz, H. C. Roemer, D. Löhlein, W. Weistenhöfer, W. Schöps, S. A. Hassan Rizvi, M. Aslam, G. Bánfi, I. Romics, M. Steffens, A. B. Ekici, A. Winterpacht, K. Ickstadt, H. Schwender, J. G. Hengstler, K. Golka, Genotyping *NAT2* with only two SNPs (rs1041983 and rs1801280) outperforms the tagging SNP rs1495741 and is equivalent to the conventional 7-SNP *NAT2* genotype. *Pharmacogenet. Genomics* **21**, 673–678 (2011).
119. N. S. Enattah, T. Sahi, E. Savilahti, J. D. Terwilliger, L. Peltonen, I. Järvelä, Identification of a variant associated with adult-type hypolactasia. *Nat. Genet.* **30**, 233–237 (2002).

120. K. Ye, Z. Gu, Recent advances in understanding the role of nutrition in human genome evolution. *Adv Nutr.* **2**, 486–496 (2011).
121. C. J. E. Ingram, M. F. Elamin, C. A. Mulcare, M. E. Weale, A. Tarekegn, T. O. Raga, E. Bekele, F. M. Elamin, M. G. Thomas, N. Bradman, D. M. Swallow, A novel polymorphism associated with lactose tolerance in Africa: Multiple causes for lactase persistence? *Hum. Genet.* **120**, 779–788 (2007).
122. X. Jeunemaitre, F. Soubrier, Y. V. Kotelevtsev, R. P. Lifton, C. S. Williams, A. Charru, S. C. Hunt, P. N. Hopkins, R. R. Williams, J.-M. Lalouel, P. Corvol, Molecular basis of human hypertension: Role of angiotensinogen. *Cell* **71**, 169–180 (1992).
123. J. Zeron-Medina, X. Wang, E. Repapi, M. R. Campbell, D. Su, F. Castro-Giner, B. Davies, E. F. P. Peterse, N. Sacilotto, G. J. Walker, T. Terzian, I. P. Tomlinson, N. F. Box, N. Meinshausen, S. De Val, D. A. Bell, G. L. Bond, A polymorphic p53 response element in KIT ligand influences cancer risk and has undergone natural selection. *Cell* **155**, 410–422 (2013).
124. D. Bangsi, J. Zhou, Y. Sun, N. P. Patel, L. L. Darga, L. K. Heilbrun, I. J. Powell, R. K. Severson, R. B. Everson, Impact of a genetic variant in CYP3A4 on risk and clinical presentation of prostate cancer among white and African-American men. *Urol. Oncol.* **24**, 21–27 (2006).
125. M. E. Mohamed, D. P. Schladt, W. Guan, B. Wu, J. van Setten, B. J. Keating, D. Iklé, R. P. Remmel, C. R. Dorr, R. B. Mannon, A. J. Matas, A. K. Israni, W. S. Oetting, P. A. Jacobson; DeKAF Genomics and GEN03 Investigators, Tacrolimus troughs and genetic determinants of metabolism in kidney transplant recipients: A comparison of four ancestry groups. *Am. J. Transplant.* **19**, 2795–2804 (2019).
126. M. Fondevila, C. Phillips, C. Santos, A. Freire Aradas, P. M. Vallone, J. M. Butler, M. V. Lareu, Á. Carracedo, Revision of the SNPforID 34-plex forensic ancestry test: Assay enhancements, standard reference sample genotypes and extended population studies. *Forensic Sci. Int. Genet.* **7**, 63–74 (2013).

127. K.-i. Yoshiura, A. Kinoshita, T. Ishida, A. Ninokata, T. Ishikawa, T. Kaname, M. Bannai, K. Tokunaga, S. Sonoda, R. Komaki, M. Ihara, V. A. Saenko, G. K. Alipov, I. Sekine, K. Komatsu, H. Takahashi, M. Nakashima, N. Sosonkina, C. K. Mapendano, M. Ghadami, M. Nomura, D.-S. Liang, N. Miwa, D.-K. Kim, A. Garidkhuu, N. Natsume, T. Ohta, H. Tomita, A. Kaneko, M. Kikuchi, G. Russomando, K. Hirayama, M. Ishibashi, A. Takahashi, N. Saitou, J. C. Murray, S. Saito, Y. Nakamura, N. Niikawa, A SNP in the *ABCC11* gene is the determinant of human earwax type. *Nat. Genet.* **38**, 324–330 (2006).
128. J. H. Mielke, L. W. Konigsberg, J. H. Relethford, *Human Biological Variation* (Oxford University Press, 2006).
129. T. Günther, H. Malmström, E. M. Svensson, A. Omrak, F. Sánchez-Quinto, G. M. Kılınç, M. Krzewińska, G. Eriksson, M. Fraser, H. Edlund, A. R. Munters, A. Coutinho, L. G. Simões, M. Vicente, A. Sjölander, B. J. Sellevold, R. Jørgensen, P. Claes, M. D. Shriver, C. Valdiosera, M. G. Netea, J. Apel, K. Lidén, B. Skar, J. Storå, A. Götherström, M. Jakobsson, Population genomics of Mesolithic Scandinavia: Investigating early postglacial migration routes and high-latitude adaptation. *PLOS Biol.* **16**, e2003703 (2018).
130. D. Melzer, J. R. B. Perry, D. Hernandez, A.-M. Corsi, K. Stevens, I. Rafferty, F. Lauretani, A. Murray, J. R. Gibbs, G. Paolisso, S. Rafiq, J. Simon-Sanchez, H. Lango, S. Scholz, M. N. Weedon, S. Arepalli, N. Rice, N. Washecka, A. Hurst, A. Britton, W. Henley, J. van de Leemput, R. Li, A. B. Newman, G. Tranah, T. Harris, V. Panicker, C. Dayan, A. Bennett, M. I. McCarthy, A. Ruokonen, M.-R. Jarvelin, J. Guralnik, S. Bandinelli, T. M. Frayling, A. Singleton, L. Ferrucci, A genome-wide association study identifies protein quantitative trait loci (pQTLs). *PLOS Genet.* **4**, e1000072 (2008).
